# Supplementary material for: Metagenomic Next-Generation Sequencing in the Diagnosis of HHV-1 Reactivation in a Critically Ill COVID-19 Patient: A Case Report
Source: Front Med (Lausanne). 2021 Oct 4;8:715519. doi: 10.3389/fmed.2021.715519 (PMC8520926; doi:10.3389/fmed.2021.715519)
Supplement: Supplementary file 4 [file Table_4.XLSX]

## Sheet: Human alphaherpesvirus 1
Reads number	Reference	Identity	Start	End
1	LT576871.1	100	100833	100907
1	X14112.1	100	101259	101333
1	LT576868.1	100	95340	95414
1	LT576870.1	100	96963	97037
1	JN555585.1	100	101260	101334
1	LT608134.1	100	98281	98355
1	LT576869.1	100	99967	100041
1	LT594192.1	100	100816	100890
1	LT576867.1	98.67	101066	101140
1	LT594108.1	98.67	100987	101061
2	JN555585.1	100	56931	56857
2	LT594192.1	100	56707	56633
2	LT608134.1	100	52456	52382
2	LT576868.1	100	51129	51055
2	LT594108.1	100	56725	56651
2	LT576870.1	100	52700	52626
2	X14112.1	100	56930	56856
2	LT576869.1	100	55831	55757
2	LT576871.1	100	55861	55787
2	LT576867.1	98.68	56585	56510
3	LT576870.1	100	141023	141097
3	LT576870.1	100	124346	124272
3	LT608134.1	100	141468	141542
3	LT594108.1	100	146714	146788
3	LT576869.1	100	122168	122094
3	JN555585.1	100	147357	147431
3	LT576867.1	100	123186	123112
3	LT594108.1	100	130177	130103
3	LT594192.1	100	129854	129780
3	JN555585.1	100	130840	130766
3	X14112.1	100	147396	147470
3	LT576869.1	100	137928	138002
3	LT576871.1	100	124301	124227
3	LT594192.1	100	146295	146369
3	X14112.1	100	130837	130763
4	LT594192.1	100	126781	126707
4	LT594108.1	100	149781	149855
4	LT576870.1	100	143474	143548
4	LT594192.1	100	149368	149442
4	LT576867.1	100	140614	140688
4	JN555585.1	100	150430	150504
4	LT576869.1	100	120428	120354
4	JN555585.1	100	127767	127693
4	LT576869.1	100	119832	119758
4	LT594108.1	100	127110	127036
4	LT576867.1	100	119747	119673
4	X14112.1	100	127764	127690
4	X14112.1	100	150469	150543
4	LT576867.1	100	120103	120038
5	LT594108.1	100	147715	147789
5	JN555585.1	100	148358	148432
5	LT594192.1	100	147296	147370
5	LT576870.1	100	142024	142098
5	LT594192.1	100	128853	128779
5	X14112.1	100	129836	129762
5	JN555585.1	100	129839	129765
5	LT594108.1	100	129176	129102
5	LT576869.1	100	121167	121093
5	LT576869.1	100	138468	138542
5	X14112.1	100	148397	148471
5	LT576867.1	100	122185	122111
6	LT576867.1	100	79478	79404
6	JN555585.1	100	79669	79595
6	X14112.1	100	79669	79595
6	LT594108.1	100	79397	79323
6	LT576869.1	98.67	78378	78304
6	LT576868.1	98.67	73767	73693
6	LT608134.1	98.67	75455	75381
6	LT576871.1	98.67	78786	78712
6	LT576870.1	98.67	75376	75302
6	LT594192.1	97.33	79243	79169
7	LT608134.1	100	12634	12560
7	LT576871.1	100	14651	14577
7	LT576867.1	100	18749	18675
7	X14112.1	100	19073	18999
7	LT576868.1	100	13280	13206
7	JN555585.1	100	19074	19000
7	LT576870.1	98.67	14853	14779
7	LT576869.1	98.67	17124	17050
7	LT594192.1	98.67	18855	18781
7	LT594108.1	97.33	18875	18801
8	LT576869.1	100	66965	67039
8	LT576870.1	100	64038	64112
8	X14112.1	100	68280	68354
8	JN555585.1	100	68280	68354
8	LT576867.1	98.67	67786	67860
8	LT594192.1	98.67	68061	68135
8	LT608134.1	97.33	63937	64011
8	LT576871.1	97.33	67313	67387
8	LT594108.1	97.33	68077	68151
8	LT576868.1	96	62333	62407
9	LT576869.1	100	97947	97873
9	LT594108.1	100	98967	98893
9	LT576867.1	100	99046	98972
9	JN555585.1	100	99240	99166
9	LT576870.1	100	94943	94869
9	X14112.1	100	99239	99165
9	LT594192.1	94.67	98796	98725
9	LT608134.1	94.67	96261	96190
9	LT576868.1	94.67	93321	93250
9	LT576871.1	94.67	98813	98742
10	JN555585.1	100	81099	81025
10	LT576869.1	100	79806	79732
10	LT576871.1	100	80214	80140
10	LT576867.1	100	80899	80825
10	LT576870.1	100	76805	76731
10	LT594192.1	100	80666	80592
10	X14112.1	100	81099	81025
10	LT608134.1	100	76883	76809
10	LT594108.1	100	80822	80748
10	LT576868.1	98.67	75192	75118
11	LT576870.1	100	53264	53190
11	LT608134.1	100	53020	52946
11	JN555585.1	100	57495	57421
11	LT576871.1	100	56425	56351
11	LT576867.1	100	57149	57075
11	X14112.1	100	57494	57420
11	LT594192.1	100	57271	57197
11	LT576869.1	100	56395	56321
11	LT576868.1	100	51693	51619
11	LT594108.1	100	57289	57215
12	JN555585.1	100	33604	33530
12	LT594108.1	100	33409	33335
12	LT576868.1	100	27804	27730
12	LT594192.1	100	33380	33306
12	LT576870.1	100	29379	29305
12	LT576867.1	100	33282	33208
12	X14112.1	100	33603	33529
12	LT576869.1	100	32290	32216
12	LT608134.1	98.67	27751	27677
12	LT576871.1	98.67	31492	31418
13	X14112.1	100	33291	33365
13	LT576869.1	100	31978	32052
13	LT594192.1	100	33068	33142
13	JN555585.1	100	33292	33366
13	LT576867.1	100	32970	33044
13	LT576868.1	100	27492	27566
13	LT608134.1	100	27439	27513
13	LT576870.1	100	29067	29141
13	LT576871.1	100	31180	31254
13	LT594108.1	98.67	33097	33171
14	LT576870.1	100	93853	93779
14	LT594108.1	100	97878	97804
14	X14112.1	100	98149	98075
14	LT576869.1	100	96857	96783
14	LT608134.1	100	95175	95101
14	LT576871.1	100	97727	97653
14	LT594192.1	100	97709	97635
14	JN555585.1	100	98150	98076
14	LT576868.1	100	92235	92161
14	LT576867.1	98.67	97951	97877
15	LT576869.1	100	104541	104467
15	LT576868.1	100	99915	99841
15	X14112.1	100	105830	105756
15	LT576871.1	100	105405	105331
15	LT576867.1	100	105643	105569
15	LT576870.1	100	101535	101461
15	JN555585.1	100	105831	105757
15	LT608134.1	100	102853	102779
15	LT594108.1	100	105562	105488
15	LT594192.1	98.67	105389	105315
16	LT576869.1	100	68753	68679
16	LT576868.1	100	64121	64047
16	JN555585.1	100	70068	69994
16	LT594192.1	100	69849	69775
16	X14112.1	100	70068	69994
16	LT576870.1	100	65826	65752
16	LT594108.1	98.67	69865	69791
16	LT608134.1	98.67	65725	65651
16	LT576871.1	98.67	69101	69027
16	LT576867.1	97.33	69574	69500
17	X14112.1	100	121654	121728
17	LT594108.1	100	4591	4517
17	LT576868.1	100	2123	2049
17	JN555585.1	100	4718	4644
17	LT576870.1	100	115778	115852
17	LT594192.1	100	121075	121149
17	LT576871.1	100	828	754
17	LT594192.1	100	4652	4578
17	X14112.1	100	4717	4643
17	LT608134.1	100	119408	119482
17	LT594108.1	100	121308	121382
17	JN555585.1	100	121656	121730
17	LT576867.1	98.67	4368	4294
17	LT576869.1	98.68	2864	2789
18	LT594108.1	100	144827	144753
18	LT594192.1	100	144421	144347
18	X14112.1	100	145468	145394
18	LT576867.1	100	138184	138110
18	LT576869.1	100	136698	136624
18	LT576868.1	100	132295	132221
18	LT576870.1	100	139823	139749
18	JN555585.1	100	145473	145399
18	LT576871.1	97.33	139455	139381
18	LT608134.1	97.33	139355	139281
19	LT576871.1	100	24892	24966
19	X14112.1	100	27579	27653
19	LT576871.1	100	24269	24343
19	LT576868.1	100	21781	21855
19	LT576869.1	100	25631	25705
19	LT594192.1	100	27356	27430
19	LT576867.1	100	27257	27331
19	LT608134.1	100	21723	21797
19	JN555585.1	100	27580	27654
19	LT594108.1	100	27381	27455
19	LT576870.1	98.67	23356	23430
20	LT576871.1	100	24892	24966
20	LT594108.1	100	27381	27455
20	LT576871.1	100	24269	24343
20	LT576867.1	100	27257	27331
20	LT608134.1	100	21723	21797
20	LT576869.1	100	25631	25705
20	LT576868.1	100	21781	21855
20	LT594192.1	100	27356	27430
20	X14112.1	100	27579	27653
20	JN555585.1	100	27580	27654
20	LT576870.1	98.67	23356	23430
21	LT576870.1	100	124696	124622
21	X14112.1	100	147046	147120
21	LT576869.1	100	122518	122444
21	LT576870.1	100	140673	140747
21	LT594108.1	100	130527	130453
21	LT576867.1	100	139382	139456
21	JN555585.1	100	131190	131116
21	LT594192.1	100	145945	146019
21	LT594192.1	100	130204	130130
21	LT576868.1	100	117649	117575
21	LT608134.1	100	140388	140462
21	JN555585.1	100	147007	147081
21	X14112.1	100	131187	131113
21	LT608134.1	100	141118	141192
21	LT576867.1	100	123536	123462
21	LT576871.1	100	124651	124577
21	LT576870.1	100	125367	125293
21	LT594108.1	100	146364	146438
22	LT576867.1	100	139382	139456
22	X14112.1	100	147046	147120
22	LT576870.1	100	124696	124622
22	LT576868.1	100	117649	117575
22	LT608134.1	100	140388	140462
22	LT576867.1	100	123536	123462
22	LT594192.1	100	145945	146019
22	LT594192.1	100	130204	130130
22	LT608134.1	100	141118	141192
22	LT576870.1	100	140673	140747
22	JN555585.1	100	147007	147081
22	LT594108.1	100	146364	146438
22	JN555585.1	100	131190	131116
22	LT576870.1	100	125367	125293
22	X14112.1	100	131187	131113
22	LT576869.1	100	122518	122444
22	LT594108.1	100	130527	130453
22	LT576871.1	100	124651	124577
23	LT576871.1	100	80653	80727
23	LT594192.1	100	81105	81179
23	LT594108.1	100	81261	81335
23	JN555585.1	100	81538	81612
23	LT608134.1	100	77322	77396
23	LT576870.1	100	77244	77318
23	X14112.1	100	81538	81612
23	LT576867.1	100	81338	81412
23	LT576868.1	100	75631	75705
23	LT576869.1	100	80245	80319
24	LT576871.1	100	77656	77582
24	LT576869.1	100	77248	77174
24	X14112.1	100	78524	78450
24	LT608134.1	100	74325	74251
24	LT594108.1	100	78267	78193
24	LT576870.1	100	74246	74172
24	LT576868.1	100	72637	72563
24	LT576867.1	100	78348	78274
24	LT594192.1	100	78113	78039
24	JN555585.1	100	78524	78450
25	LT594192.1	100	50770	50844
25	LT576868.1	100	45199	45273
25	LT594108.1	97.33	50800	50874
25	LT608134.1	97.33	46160	46234
25	JN555585.1	97.33	51006	51080
25	X14112.1	97.33	51005	51079
25	LT576867.1	97.33	50664	50738
25	LT576870.1	97.33	46776	46850
25	LT576869.1	97.33	49905	49979
25	LT576871.1	97.33	49356	49430
26	X14112.1	100	147438	147512
26	LT594192.1	100	129812	129738
26	LT576870.1	100	124304	124230
26	LT594192.1	100	146337	146411
26	LT576869.1	100	137970	138044
26	LT594108.1	100	130135	130061
26	LT576869.1	100	122126	122052
26	LT576870.1	100	141065	141139
26	JN555585.1	100	147399	147473
26	JN555585.1	100	130798	130724
26	LT594108.1	100	146756	146830
26	LT576871.1	100	124259	124185
26	LT608134.1	100	141510	141584
26	X14112.1	100	130795	130721
26	LT576867.1	100	123144	123076
27	LT576868.1	100	133	207
27	X14112.1	100	1213	1287
27	LT576871.1	100	123983	123909
27	LT576867.1	100	921	995
27	JN555585.1	100	125161	125087
27	LT594108.1	100	124801	124727
27	LT594108.1	100	1098	1172
27	LT576869.1	100	117099	117025
27	LT608134.1	100	123097	123023
27	LT576870.1	100	120905	120831
27	X14112.1	100	125158	125084
27	LT594192.1	100	1169	1243
27	LT594192.1	100	124558	124484
27	LT576869.1	100	117764	117690
27	JN555585.1	100	1213	1287
28	X14112.1	100	95229	95303
28	LT608134.1	100	92255	92329
28	LT576871.1	100	94807	94881
28	LT594108.1	100	94957	95031
28	LT576868.1	100	89316	89390
28	LT576867.1	100	95028	95102
28	LT576869.1	100	93936	94010
28	JN555585.1	100	95229	95303
28	LT594192.1	100	94789	94863
28	LT576870.1	100	90933	91007
29	LT576871.1	100	123983	123909
29	JN555585.1	100	1213	1287
29	LT576870.1	100	120905	120831
29	LT594108.1	100	124801	124727
29	LT576869.1	100	117099	117025
29	LT608134.1	100	123097	123023
29	LT576868.1	100	133	207
29	LT594192.1	100	124558	124484
29	JN555585.1	100	125161	125087
29	LT576867.1	100	921	995
29	LT594192.1	100	1169	1243
29	LT594108.1	100	1098	1172
29	LT576869.1	100	117764	117690
29	X14112.1	100	1213	1287
29	X14112.1	100	125158	125084
30	LT594108.1	100	40740	40666
30	LT576867.1	100	40602	40528
30	LT594192.1	100	40713	40639
30	X14112.1	100	40938	40864
30	JN555585.1	100	40939	40865
30	LT576868.1	100	35135	35061
30	LT576869.1	100	39616	39549
30	LT576870.1	100	36701	36634
30	LT608134.1	100	36086	36019
30	LT576871.1	100	39283	39216
31	LT608134.1	100	66038	66112
31	X14112.1	100	70381	70455
31	LT576871.1	100	69414	69488
31	LT576867.1	100	69887	69961
31	LT594192.1	100	70162	70236
31	LT576869.1	100	69066	69140
31	LT576868.1	100	64434	64508
31	LT594108.1	100	70178	70252
31	JN555585.1	100	70381	70455
31	LT576870.1	100	66139	66213
32	LT576871.1	100	91905	91831
32	LT576868.1	100	86414	86340
32	LT594192.1	100	91887	91813
32	X14112.1	100	92329	92255
32	LT594108.1	100	92053	91979
32	LT576867.1	100	92125	92051
32	JN555585.1	100	92328	92254
32	LT608134.1	100	89353	89279
32	LT576869.1	98.67	91033	90959
32	LT576870.1	98.67	88031	87957
33	LT576870.1	100	140261	140187
33	LT576869.1	100	137136	137062
33	X14112.1	100	146030	145956
33	LT576870.1	100	126380	126454
33	JN555585.1	100	145991	145917
33	LT576869.1	100	123533	123607
33	LT594108.1	100	145349	145275
33	LT594108.1	100	131542	131616
33	X14112.1	100	132203	132277
33	JN555585.1	100	132206	132280
33	LT594192.1	100	144931	144863
33	LT576871.1	100	125662	125730
33	LT594192.1	100	131218	131285
33	LT608134.1	100	123504	123569
33	LT576867.1	98.51	138621	138555
33	LT576867.1	98.48	124551	124616
34	X14112.1	100	147339	147266
34	LT594108.1	100	130234	130307
34	LT576869.1	100	122225	122298
34	LT576867.1	100	123243	123316
34	LT608134.1	100	141411	141338
34	LT594108.1	100	146657	146584
34	JN555585.1	100	130897	130970
34	LT594192.1	100	146238	146165
34	LT576870.1	100	124403	124476
34	LT576871.1	100	124358	124431
34	JN555585.1	100	147300	147227
34	LT576868.1	100	117356	117429
34	LT576869.1	100	137871	137798
34	X14112.1	100	130894	130967
34	LT594192.1	100	129911	129984
34	LT576870.1	100	140966	140893
35	LT576870.1	100	127422	127496
35	LT576867.1	100	125598	125672
35	LT576869.1	100	124575	124649
35	LT594108.1	100	132668	132742
35	LT576868.1	98.67	119248	119322
35	LT594192.1	98.67	132336	132410
35	LT576871.1	98.67	126792	126866
35	JN555585.1	98.67	133331	133405
35	X14112.1	98.67	133328	133402
35	LT608134.1	98.67	124672	124746
36	LT576870.1	100	34031	33957
36	LT576868.1	100	32457	32383
36	LT576871.1	100	36613	36539
36	LT594108.1	100	38062	37988
36	LT576869.1	100	36945	36871
36	LT594192.1	100	38034	37960
36	LT608134.1	100	33417	33343
36	LT576867.1	98.67	37924	37850
36	JN555585.1	97.33	38258	38184
36	X14112.1	97.33	38257	38183
37	LT576869.1	100	49986	50060
37	LT576867.1	100	50745	50819
37	LT594108.1	100	50881	50955
37	LT576871.1	100	49437	49511
37	X14112.1	100	51086	51160
37	LT594192.1	100	50851	50925
37	LT576870.1	100	46857	46931
37	LT608134.1	100	46241	46315
37	JN555585.1	100	51087	51161
37	LT576868.1	100	45280	45354
38	JN555585.1	100	97471	97545
38	X14112.1	100	97470	97544
38	LT576867.1	100	97271	97345
38	LT576871.1	100	97050	97124
38	LT576870.1	100	93175	93249
38	LT594192.1	100	97031	97105
38	LT576869.1	100	96179	96253
38	LT576868.1	100	91557	91631
38	LT608134.1	100	94498	94572
38	LT594108.1	98.67	97200	97274
39	JN555585.1	100	96756	96682
39	LT594192.1	100	96316	96242
39	LT576868.1	100	90842	90768
39	LT576870.1	100	92460	92386
39	LT576869.1	100	95464	95390
39	X14112.1	100	96755	96681
39	LT608134.1	96	93783	93709
39	LT576867.1	96	96556	96482
39	LT594108.1	96	96485	96411
39	LT576871.1	96	96335	96261
40	JN555585.1	100	17862	17788
40	X14112.1	100	17861	17787
40	LT576867.1	100	17538	17464
40	LT594192.1	100	17641	17567
40	LT594108.1	98.67	17662	17588
40	LT608134.1	97.33	11421	11347
40	LT576871.1	97.33	13438	13364
40	LT576869.1	97.33	15909	15835
40	LT576868.1	97.33	12068	11994
40	LT576870.1	97.33	13638	13564
41	LT576871.1	100	12441	12367
41	LT576870.1	100	12641	12567
41	X14112.1	100	16864	16790
41	LT608134.1	100	10424	10350
41	LT576868.1	100	11071	10997
41	LT594108.1	100	16665	16591
41	LT576869.1	100	14912	14838
41	LT576867.1	100	16541	16467
41	JN555585.1	100	16865	16791
41	LT594192.1	100	16644	16570
42	JN555585.1	100	44225	44299
42	X14112.1	100	44224	44298
42	LT594108.1	100	44021	44095
42	LT608134.1	100	39380	39454
42	LT576871.1	100	42577	42651
42	LT576868.1	100	38424	38498
42	LT576870.1	100	39998	40072
42	LT594192.1	100	43993	44067
42	LT576869.1	100	43125	43199
42	LT576867.1	98.67	43883	43957
43	LT576867.1	100	30025	30099
43	JN555585.1	100	30348	30422
43	X14112.1	100	30347	30421
43	LT576869.1	100	28399	28473
43	LT594108.1	100	30153	30227
43	LT576868.1	100	24548	24622
43	LT594192.1	100	30124	30198
43	LT576870.1	100	26124	26198
43	LT576871.1	98.67	28236	28310
43	LT608134.1	98.67	24495	24569
44	LT594192.1	100	110683	110757
44	LT594108.1	100	110856	110930
44	X14112.1	100	111124	111198
44	LT608134.1	100	108590	108664
44	JN555585.1	100	111125	111199
44	LT576868.1	100	105209	105283
44	LT576870.1	100	106827	106901
44	LT576869.1	100	109836	109910
44	LT576867.1	100	110938	111012
44	LT576871.1	100	111249	111323
45	LT594108.1	100	43121	43047
45	X14112.1	100	43320	43246
45	LT608134.1	100	38474	38400
45	LT576871.1	100	41671	41597
45	JN555585.1	100	43321	43247
45	LT594192.1	100	43095	43021
45	LT576868.1	100	37523	37449
45	LT576867.1	98.67	42981	42907
45	LT576869.1	98.67	42223	42149
45	LT576870.1	98.67	39096	39022
46	JN555585.1	100	136835	136909
46	X14112.1	100	136832	136906
46	LT576869.1	100	128080	128154
46	LT576871.1	100	130295	130369
46	LT594108.1	100	136171	136245
46	LT576868.1	100	123220	123294
46	LT594192.1	100	135840	135914
46	LT576867.1	100	129102	129176
46	LT576870.1	100	130926	131000
46	LT608134.1	100	129833	129907
47	LT594192.1	100	11875	11949
47	X14112.1	100	12095	12169
47	LT576870.1	100	7872	7946
47	LT576868.1	100	6302	6376
47	JN555585.1	100	12096	12170
47	LT576869.1	100	10142	10216
47	LT576867.1	100	11772	11846
47	LT594108.1	100	11896	11970
47	LT608134.1	97.33	5084	5158
47	LT576871.1	97.33	7098	7172
48	LT594108.1	100	102222	102148
48	JN555585.1	98.67	102495	102421
48	LT576871.1	98.67	102068	101994
48	LT594192.1	98.67	102051	101977
48	X14112.1	98.67	102494	102420
48	LT608134.1	98.67	99516	99442
48	LT576869.1	98.67	101202	101128
48	LT576870.1	98.67	98198	98124
48	LT576868.1	98.67	96576	96502
48	LT576867.1	97.33	102301	102227
49	LT576868.1	100	78797	78724
49	LT576867.1	100	84508	84435
49	X14112.1	100	84711	84638
49	LT608134.1	100	80903	80830
49	LT576870.1	100	80414	80341
49	LT576869.1	100	83416	83343
49	LT576871.1	100	83821	83748
49	JN555585.1	100	84711	84638
49	LT594192.1	98.65	84270	84197
49	LT594108.1	98.65	84426	84353
50	LT576868.1	100	24638	24564
50	LT594192.1	100	30214	30140
50	LT576870.1	100	26214	26140
50	LT576869.1	100	28489	28415
50	JN555585.1	100	30438	30364
50	LT576867.1	100	30115	30041
50	X14112.1	100	30437	30363
50	LT594108.1	98.67	30243	30169
50	LT576871.1	98.67	28326	28252
50	LT608134.1	98.67	24585	24511
51	LT576867.1	100	126649	126575
51	LT594108.1	100	133718	133644
51	X14112.1	97.33	134379	134305
51	LT608134.1	97.33	126149	126075
51	LT576869.1	97.33	125626	125552
51	LT576871.1	97.33	127842	127768
51	LT594192.1	97.33	133386	133312
51	LT576870.1	97.33	128473	128399
51	JN555585.1	97.33	134382	134308
51	LT576868.1	97.33	120767	120693
51	LT576868.1	96	120297	120224
52	LT594108.1	100	81475	81549
52	LT576868.1	97.33	75845	75919
52	X14112.1	97.33	81752	81826
52	LT576867.1	97.33	81552	81626
52	JN555585.1	97.33	81752	81826
52	LT576871.1	96	80867	80941
52	LT594192.1	96	81319	81393
52	LT576870.1	96	77458	77532
52	LT608134.1	96	77536	77610
52	LT576869.1	96	80459	80533
53	LT576869.1	100	118581	118507
53	JN555585.1	100	450	524
53	LT576870.1	100	121695	121621
53	LT576867.1	100	170	244
53	X14112.1	100	125921	125847
53	LT594108.1	100	125537	125463
53	LT594192.1	100	125387	125313
53	JN555585.1	100	125924	125850
53	LT594108.1	100	362	436
53	X14112.1	100	450	524
53	LT594192.1	100	340	414
54	LT608134.1	100	84299	84225
54	LT576870.1	100	83810	83736
54	JN555585.1	100	88107	88033
54	X14112.1	100	88108	88034
54	LT576868.1	100	82193	82119
54	LT576871.1	100	87217	87143
54	LT594192.1	100	87666	87592
54	LT594108.1	100	87832	87758
54	LT576869.1	100	86812	86738
54	LT576867.1	98.67	87904	87830
55	LT576870.1	100	99858	99932
55	LT576871.1	100	103728	103802
55	LT576868.1	100	98236	98310
55	LT576869.1	100	102864	102938
55	JN555585.1	100	104155	104229
55	LT594192.1	100	103711	103785
55	LT608134.1	100	101176	101250
55	LT594108.1	100	103884	103958
55	X14112.1	100	104154	104228
55	LT576867.1	98.67	103966	104040
56	LT576870.1	100	103103	103029
56	LT576867.1	100	107213	107139
56	JN555585.1	100	107401	107327
56	LT576871.1	100	106975	106901
56	LT594108.1	100	107132	107058
56	LT594192.1	100	106959	106885
56	LT576869.1	100	106110	106036
56	LT608134.1	100	104423	104349
56	LT576868.1	100	101485	101411
56	X14112.1	100	107400	107326
57	LT576867.1	100	22366	22292
57	LT594108.1	100	22494	22420
57	LT576869.1	100	20740	20666
57	JN555585.1	100	22693	22619
57	LT594192.1	100	22473	22399
57	LT576870.1	100	18469	18395
57	X14112.1	98.67	22692	22618
57	LT608134.1	98.67	16840	16766
57	LT576868.1	98.67	16898	16824
57	LT576871.1	98.67	18816	18742
58	LT576869.1	100	125672	125746
58	LT608134.1	100	126195	126269
58	LT576871.1	100	127888	127962
58	LT576867.1	100	126695	126769
58	LT594108.1	100	133764	133838
58	LT594192.1	100	133432	133506
58	LT576870.1	100	128519	128593
58	X14112.1	100	134425	134499
58	JN555585.1	100	134428	134502
58	LT576868.1	100	120813	120887
58	LT576868.1	100	120343	120406
59	LT576871.1	100	45187	45113
59	LT576870.1	100	42608	42534
59	LT594192.1	100	46603	46529
59	LT576869.1	100	45736	45662
59	LT576867.1	100	46494	46420
59	JN555585.1	100	46835	46761
59	LT608134.1	100	41990	41916
59	X14112.1	100	46833	46760
59	LT576868.1	98.67	41030	40956
59	LT594108.1	98.67	46629	46555
60	X14112.1	100	10268	10194
60	JN555585.1	100	10269	10195
60	LT594192.1	100	10048	9974
60	LT576870.1	98.67	6046	5972
60	LT576869.1	98.67	8316	8242
60	LT594108.1	98.67	10070	9996
60	LT576867.1	98.67	9939	9865
60	LT576871.1	98.65	4662	4589
60	LT608134.1	98.65	2505	2432
60	LT576871.1	98.65	4031	3958
60	LT576868.1	97.33	4473	4399
61	LT576870.1	100	126885	126959
61	LT594108.1	100	132131	132205
61	LT576869.1	100	124038	124112
61	LT576867.1	98.67	125061	125135
61	LT594192.1	98.67	131799	131873
61	LT576868.1	98.67	118711	118785
61	JN555585.1	98.67	132794	132868
61	X14112.1	98.67	132791	132865
61	LT576871.1	97.33	126255	126329
61	LT608134.1	97.33	124135	124209
62	LT594192.1	100	7283	7209
62	LT594192.1	100	118444	118518
62	X14112.1	100	119000	119074
62	JN555585.1	100	119001	119075
62	JN555585.1	100	7373	7299
62	X14112.1	100	7371	7297
62	LT594108.1	98.67	118645	118719
62	LT576871.1	98.67	119007	119081
62	LT608134.1	98.67	117099	117173
62	LT594108.1	98.67	7254	7180
62	LT576871.1	98.67	2231	2157
62	LT576867.1	94.67	7093	7019
62	LT576868.1	94.67	112533	112607
62	LT576870.1	93.33	113236	113310
62	LT576869.1	93.33	5498	5424
62	LT576870.1	93.33	3273	3199
63	JN555585.1	100	62590	62663
63	LT576869.1	100	61269	61342
63	LT594108.1	100	62385	62458
63	LT576870.1	100	58347	58420
63	LT576868.1	100	56640	56713
63	X14112.1	100	62590	62663
63	LT594192.1	100	62370	62443
63	LT576871.1	100	61622	61695
63	LT608134.1	100	58245	58318
63	LT576867.1	98.65	62093	62166
64	LT594192.1	100	2374	2448
64	X14112.1	100	123938	123864
64	LT576868.1	100	115916	115842
64	JN555585.1	100	2434	2508
64	LT594108.1	100	123595	123521
64	JN555585.1	100	123940	123866
64	X14112.1	100	2433	2507
64	LT608134.1	100	121342	121268
64	LT594108.1	100	2304	2378
64	LT576871.1	100	122362	122288
64	LT594192.1	100	123353	123279
64	LT576867.1	98.67	2072	2146
65	LT576867.1	100	36883	36809
65	LT594192.1	100	36993	36919
65	X14112.1	100	37216	37142
65	LT594108.1	100	37021	36947
65	LT608134.1	100	32376	32302
65	LT576868.1	100	31416	31342
65	LT576869.1	100	35903	35829
65	LT576870.1	100	32990	32916
65	JN555585.1	100	37217	37143
65	LT576871.1	100	35572	35498
66	LT576868.1	100	21310	21384
66	LT576869.1	100	25160	25234
66	X14112.1	100	27108	27182
66	LT576871.1	100	23230	23304
66	JN555585.1	100	27109	27183
66	LT576867.1	100	26786	26860
66	LT594108.1	100	26910	26984
66	LT576870.1	100	22885	22959
66	LT576871.1	100	23798	23872
66	LT608134.1	100	21252	21326
66	LT594192.1	100	26885	26959
67	LT576867.1	100	74050	74124
67	JN555585.1	100	74228	74302
67	LT594192.1	100	73817	73891
67	X14112.1	100	74228	74302
67	LT576870.1	100	69950	70024
67	LT608134.1	100	70029	70103
67	LT576871.1	100	73360	73434
67	LT576869.1	100	72950	73024
67	LT576868.1	100	68341	68415
67	LT594108.1	100	73971	74045
68	LT594108.1	100	136779	136853
68	LT576867.1	94.94	129704	129782
68	LT594192.1	97.37	136445	136520
68	LT608134.1	97.37	130438	130513
68	LT576869.1	97.37	128686	128761
68	LT576868.1	97.37	123825	123900
68	LT576870.1	97.37	131531	131606
68	LT608134.1	97.37	130765	130840
68	LT576871.1	97.37	130900	130975
68	X14112.1	96.05	137437	137512
68	JN555585.1	96.05	137440	137515
69	X14112.1	100	33323	33249
69	JN555585.1	100	33324	33250
69	LT608134.1	100	27471	27397
69	LT594192.1	100	33100	33026
69	LT576870.1	100	29099	29025
69	LT576868.1	100	27524	27450
69	LT576867.1	100	33002	32928
69	LT576869.1	100	32010	31936
69	LT576871.1	100	31212	31138
69	LT594108.1	97.33	33129	33055
70	LT594108.1	100	77138	77064
70	LT594192.1	100	76984	76910
70	JN555585.1	100	77395	77321
70	X14112.1	100	77395	77321
70	LT576870.1	98.67	73117	73043
70	LT608134.1	98.67	73196	73122
70	LT576871.1	98.67	76527	76453
70	LT576868.1	98.67	71508	71434
70	LT576869.1	98.67	76119	76045
70	LT576867.1	98.67	77219	77145
71	X14112.1	100	39621	39695
71	JN555585.1	100	39622	39696
71	LT576867.1	100	39289	39363
71	LT576868.1	100	33821	33895
71	LT594108.1	100	39426	39500
71	LT594192.1	100	39398	39472
71	LT608134.1	98.65	34781	34854
71	LT576869.1	98.65	38310	38383
71	LT576870.1	98.65	35395	35468
71	LT576871.1	98.65	37977	38050
72	LT594192.1	100	123353	123279
72	JN555585.1	100	2434	2508
72	X14112.1	100	123938	123864
72	X14112.1	100	2433	2507
72	LT608134.1	100	121342	121268
72	LT594108.1	100	2304	2378
72	LT594192.1	100	2374	2448
72	JN555585.1	100	123940	123866
72	LT576871.1	100	122362	122288
72	LT576868.1	100	115916	115842
72	LT594108.1	100	123595	123521
72	LT576867.1	98.67	2072	2146
73	LT576870.1	100	42382	42308
73	LT608134.1	100	41764	41690
73	LT576871.1	100	44961	44887
73	LT576869.1	100	45510	45436
73	LT576868.1	100	40806	40732
73	LT576867.1	100	46268	46194
73	LT594192.1	100	46377	46303
73	JN555585.1	100	46609	46535
73	X14112.1	100	46608	46534
73	LT594108.1	98.67	46403	46329
74	LT594108.1	100	72859	72932
74	X14112.1	100	73116	73189
74	LT576867.1	100	72938	73011
74	JN555585.1	100	73116	73189
74	LT576869.1	100	71838	71911
74	LT594192.1	100	72705	72778
74	LT576870.1	98.65	68839	68911
74	LT576871.1	98.65	72249	72321
74	LT608134.1	98.65	68918	68990
74	LT576868.1	98.65	67230	67302
75	LT576867.1	100	22503	22429
75	JN555585.1	100	22830	22756
75	LT576871.1	100	18953	18879
75	LT576870.1	100	18606	18532
75	LT594192.1	100	22610	22536
75	LT576868.1	100	17035	16961
75	LT608134.1	100	16977	16903
75	LT594108.1	100	22631	22557
75	LT576869.1	100	20877	20803
75	X14112.1	100	22829	22755
76	X14112.1	100	105659	105585
76	LT594192.1	100	105218	105144
76	LT576869.1	100	104370	104296
76	LT576870.1	100	101364	101290
76	LT576867.1	100	105472	105398
76	LT594108.1	100	105391	105317
76	LT576871.1	100	105234	105160
76	LT576868.1	100	99744	99670
76	LT608134.1	100	102682	102608
76	JN555585.1	100	105660	105586
77	LT576869.1	100	136829	136755
77	LT576870.1	100	139954	139880
77	LT576868.1	100	132426	132352
77	LT594192.1	100	144552	144478
77	LT594108.1	94.67	144958	144884
78	LT608134.1	100	36296	36222
78	LT576871.1	100	39493	39419
78	LT576869.1	100	40037	39963
78	LT594192.1	100	40916	40842
78	JN555585.1	100	41142	41068
78	LT594108.1	100	40943	40869
78	X14112.1	100	41141	41067
78	LT576870.1	100	36911	36837
78	LT576868.1	98.67	35338	35264
78	LT576867.1	98.63	40807	40735
79	X14112.1	100	112420	112494
79	LT594192.1	100	111979	112053
79	JN555585.1	100	112421	112495
79	LT576868.1	100	106505	106579
79	LT594108.1	100	112152	112226
79	LT576871.1	98.67	112545	112619
79	LT608134.1	98.67	109886	109960
79	LT576870.1	98.67	108123	108197
79	LT576869.1	98.67	111132	111206
79	LT576867.1	97.33	112234	112308
80	X14112.1	100	17203	17130
80	JN555585.1	100	17204	17131
80	LT576868.1	100	11410	11337
80	LT594192.1	100	16983	16910
80	LT576867.1	100	16880	16807
80	LT594108.1	98.65	17004	16931
80	LT576869.1	98.65	15251	15178
80	LT576870.1	98.65	12980	12907
80	LT576871.1	98.63	12780	12708
80	LT608134.1	98.63	10763	10691
81	LT594192.1	98.67	110085	110011
81	JN555585.1	98.67	110527	110453
81	LT576868.1	98.67	104611	104537
81	LT576871.1	98.67	110651	110577
81	X14112.1	98.67	110526	110452
81	LT576869.1	98.67	109238	109164
81	LT608134.1	98.67	107992	107918
81	LT576870.1	98.67	106229	106155
81	LT594108.1	97.33	110258	110184
81	LT576867.1	97.33	110340	110266
82	LT594108.1	100	88366	88292
82	LT576869.1	100	87346	87272
82	LT576867.1	100	88438	88364
82	LT594192.1	100	88200	88126
82	JN555585.1	100	88641	88567
82	LT576870.1	100	84344	84270
82	LT576868.1	100	82727	82653
82	LT608134.1	100	85243	85169
82	LT608134.1	100	84833	84759
82	X14112.1	100	88642	88568
82	LT576871.1	100	87751	87677
83	LT594108.1	100	18295	18369
83	LT608134.1	100	12054	12128
83	LT576871.1	100	14071	14145
83	LT576868.1	100	12700	12774
83	JN555585.1	98.67	18494	18568
83	X14112.1	98.67	18493	18567
83	LT576867.1	98.67	18169	18243
83	LT576869.1	98.67	16544	16618
83	LT576870.1	98.67	14273	14347
83	LT594192.1	96	18275	18349
84	LT594192.1	100	38623	38550
84	LT594108.1	100	38651	38578
84	LT576870.1	100	34620	34547
84	LT576871.1	100	37202	37129
84	LT608134.1	100	34006	33933
84	LT576867.1	100	38513	38440
84	LT576868.1	100	33046	32973
84	LT576869.1	100	37534	37461
84	X14112.1	100	38846	38773
84	JN555585.1	100	38847	38774
85	LT576867.1	100	131874	131800
85	JN555585.1	100	139611	139537
85	LT594192.1	100	138612	138538
85	LT576871.1	100	133070	132996
85	LT608134.1	100	132936	132862
85	LT576868.1	100	125991	125917
85	LT576870.1	100	133702	133628
85	X14112.1	100	139607	139533
85	LT576869.1	100	130857	130783
85	LT594108.1	97.33	138947	138873
86	LT576869.1	100	126674	126748
86	LT608134.1	100	127197	127271
86	LT594192.1	100	134435	134509
86	LT594108.1	100	134767	134841
86	LT608134.1	100	127791	127865
86	LT576870.1	100	129521	129595
86	LT576868.1	100	121815	121889
86	LT576871.1	100	128890	128964
86	LT576867.1	100	127697	127771
86	JN555585.1	98.67	135430	135504
86	X14112.1	98.67	135427	135501
87	LT576869.1	100	72906	72832
87	JN555585.1	100	74184	74110
87	LT576871.1	100	73316	73242
87	LT576870.1	100	69906	69832
87	X14112.1	100	74184	74110
87	LT608134.1	100	69985	69911
87	LT576868.1	100	68297	68223
87	LT576867.1	100	74006	73932
87	LT594108.1	100	73927	73853
87	LT594192.1	100	73773	73699
88	LT608134.1	100	78375	78449
88	JN555585.1	100	82591	82665
88	LT594108.1	100	82314	82388
88	LT576871.1	100	81706	81780
88	LT576867.1	100	82392	82466
88	LT576870.1	100	78298	78372
88	X14112.1	100	82591	82665
88	LT576868.1	100	76684	76758
88	LT594192.1	100	82158	82232
88	LT576869.1	100	81299	81373
89	LT576871.1	100	21336	21262
89	LT594108.1	100	25016	24942
89	LT576870.1	100	20991	20917
89	LT576867.1	100	24890	24816
89	LT576869.1	100	23264	23190
89	LT608134.1	100	19358	19284
89	LT576868.1	100	19416	19342
89	X14112.1	100	25214	25140
89	JN555585.1	100	25215	25141
89	LT594192.1	100	24991	24917
90	LT594192.1	100	150256	150330
90	JN555585.1	100	151690	151764
90	JN555585.1	100	126507	126433
90	X14112.1	100	126504	126430
90	LT594192.1	100	125893	125819
90	X14112.1	100	151729	151803
90	LT576867.1	98.57	118798	118729
90	LT594108.1	100	150763	150824
90	LT594108.1	100	126043	125982
91	LT608134.1	100	12054	12128
91	LT576868.1	100	12700	12774
91	LT576871.1	100	14071	14145
91	LT594108.1	100	18295	18369
91	JN555585.1	98.67	18494	18568
91	X14112.1	98.67	18493	18567
91	LT576867.1	98.67	18169	18243
91	LT576869.1	98.67	16544	16618
91	LT576870.1	98.67	14273	14347
91	LT594192.1	96	18275	18349
92	LT608134.1	100	94946	95020
92	X14112.1	100	97920	97994
92	LT576868.1	100	92006	92080
92	JN555585.1	100	97921	97995
92	LT576870.1	100	93624	93698
92	LT576871.1	100	97498	97572
92	LT576869.1	100	96628	96702
92	LT594192.1	100	97480	97554
92	LT594108.1	100	97649	97723
92	LT576867.1	98.67	97722	97796
93	LT576871.1	100	131975	131901
93	LT608134.1	100	131841	131767
93	LT576869.1	100	129762	129688
93	LT594108.1	100	137852	137778
93	LT576870.1	100	132607	132533
93	LT576868.1	100	124896	124822
93	LT594192.1	100	137517	137443
93	LT576867.1	100	130779	130705
93	JN555585.1	100	138510	138442
93	X14112.1	98.55	138506	138438
94	LT576870.1	100	59191	59117
94	JN555585.1	100	63433	63359
94	LT594192.1	100	63214	63140
94	LT594108.1	100	63230	63156
94	X14112.1	100	63433	63359
94	LT608134.1	100	59090	59016
94	LT576869.1	100	62114	62040
94	LT576868.1	100	57486	57412
94	LT576867.1	100	62937	62863
94	LT576871.1	100	62466	62392
95	LT594108.1	100	54683	54757
95	LT576867.1	100	54541	54615
95	LT608134.1	100	50414	50488
95	LT576871.1	100	53819	53893
95	LT576868.1	100	49088	49162
95	LT576870.1	100	50658	50732
95	LT576869.1	100	53789	53863
95	LT594192.1	100	54665	54739
95	JN555585.1	98.67	54889	54963
95	X14112.1	98.67	54888	54962
96	LT594192.1	100	73350	73276
96	JN555585.1	98.67	73761	73687
96	X14112.1	98.67	73761	73687
96	LT576867.1	98.67	73583	73509
96	LT594108.1	98.67	73504	73430
96	LT576869.1	98.67	72483	72409
96	LT608134.1	98.67	69562	69488
96	LT576868.1	98.67	67874	67800
96	LT576871.1	98.67	72893	72819
96	LT576870.1	98.67	69483	69409
97	LT594192.1	100	112569	112495
97	LT576871.1	100	113135	113061
97	LT576870.1	100	108713	108639
97	X14112.1	100	113010	112936
97	LT608134.1	100	110707	110633
97	LT576869.1	100	111722	111648
97	LT576868.1	100	107095	107021
97	LT576867.1	100	112824	112750
97	LT594108.1	100	112742	112668
97	JN555585.1	100	113011	112937
98	JN555585.1	100	88139	88065
98	X14112.1	100	88140	88066
98	LT594108.1	100	87864	87790
98	LT576871.1	100	87249	87175
98	LT608134.1	100	84331	84257
98	LT576867.1	100	87936	87862
98	LT594192.1	100	87698	87624
98	LT576870.1	100	83842	83768
98	LT576869.1	100	86844	86770
98	LT576868.1	100	82225	82151
99	JN555585.1	100	16734	16808
99	LT576871.1	100	12310	12384
99	X14112.1	100	16733	16807
99	LT594108.1	100	16534	16608
99	LT576870.1	100	12510	12584
99	LT576869.1	100	14781	14855
99	LT608134.1	100	10293	10367
99	LT576868.1	98.67	10940	11014
99	LT594192.1	98.67	16513	16587
99	LT576867.1	98.67	16410	16484
100	LT576867.1	100	126715	126789
100	X14112.1	100	134445	134519
100	LT576871.1	100	127908	127982
100	LT608134.1	100	126215	126289
100	LT594108.1	100	133784	133858
100	JN555585.1	100	134448	134522
100	LT576869.1	100	125692	125766
100	LT576868.1	100	120833	120907
100	LT576870.1	100	128539	128613
100	LT594192.1	100	133452	133526
101	LT576871.1	100	81790	81863
101	LT608134.1	100	78459	78532
101	LT576868.1	100	76768	76841
101	X14112.1	100	82675	82748
101	JN555585.1	100	82675	82748
101	LT576867.1	98.67	82476	82550
101	LT594108.1	98.67	82398	82472
101	LT594192.1	100	82246	82316
101	LT576869.1	100	81387	81457
101	LT576870.1	100	78386	78456
102	LT576868.1	98.67	114711	114785
102	LT594192.1	98.67	122154	122228
102	JN555585.1	98.67	3635	3561
102	LT576870.1	98.67	117822	117896
102	LT608134.1	98.67	120165	120239
102	LT576871.1	98.67	625	551
102	LT576867.1	98.67	117390	117464
102	LT576870.1	98.67	116847	116921
102	LT576869.1	98.67	1793	1719
102	JN555585.1	98.67	122739	122813
102	X14112.1	98.67	3634	3560
102	LT576871.1	98.67	121187	121261
102	X14112.1	98.67	122737	122811
102	LT576867.1	98.67	3270	3196
102	LT594192.1	98.67	3573	3499
102	LT576870.1	98.67	644	570
102	LT594108.1	97.33	122391	122465
102	LT594108.1	97.33	3508	3434
103	JN555585.1	100	52702	52776
103	LT594192.1	100	52466	52540
103	X14112.1	100	52701	52775
103	LT576868.1	100	46895	46969
103	LT594108.1	100	52496	52570
103	LT576869.1	100	51601	51675
103	LT576867.1	100	52360	52434
103	LT608134.1	100	47856	47930
103	LT576871.1	100	51052	51126
103	LT576870.1	100	48472	48546
104	LT594192.1	100	134221	134294
104	X14112.1	100	135213	135286
104	LT576869.1	100	126460	126533
104	JN555585.1	100	135216	135289
104	LT608134.1	100	126983	127056
104	LT576867.1	100	127483	127556
104	LT576871.1	100	128676	128749
104	LT594108.1	100	134553	134626
104	LT576868.1	100	121601	121674
104	LT576870.1	100	129307	129380
105	JN555585.1	98.67	122704	122778
105	LT594192.1	98.67	122119	122193
105	JN555585.1	98.67	3670	3596
105	X14112.1	98.67	3669	3595
105	X14112.1	98.67	122702	122776
105	LT594192.1	98.67	3608	3534
105	LT594108.1	98.67	122356	122430
105	LT608134.1	98.67	120130	120204
105	LT576871.1	98.67	121152	121226
105	LT576870.1	98.67	116812	116886
105	LT576869.1	98.67	1828	1754
105	LT576867.1	98.67	117355	117429
105	LT576867.1	98.67	3305	3231
105	LT576868.1	98.67	114676	114750
105	LT576870.1	98.67	117787	117861
105	LT576870.1	98.67	679	605
105	LT594108.1	98.67	3543	3469
105	LT576871.1	98.33	645	586
106	LT576867.1	100	77963	77890
106	LT576870.1	100	73861	73788
106	X14112.1	100	78139	78066
106	LT576869.1	100	76863	76790
106	LT576868.1	100	72252	72179
106	LT608134.1	100	73940	73867
106	LT594192.1	100	77728	77655
106	LT576871.1	100	77271	77198
106	JN555585.1	100	78139	78066
106	LT594108.1	98.65	77882	77809
107	LT576870.1	100	108618	108692
107	JN555585.1	100	112916	112990
107	LT576871.1	100	113040	113114
107	X14112.1	100	112915	112989
107	LT576869.1	100	111627	111701
107	LT594192.1	100	112474	112548
107	LT576868.1	100	107000	107074
107	LT576867.1	100	112729	112803
107	LT594108.1	100	112647	112721
107	LT608134.1	100	110612	110686
108	X14112.1	100	18065	17991
108	LT594192.1	100	17845	17771
108	JN555585.1	100	18066	17992
108	LT594108.1	98.67	17866	17792
108	LT576871.1	97.33	13642	13568
108	LT608134.1	97.33	11625	11551
108	LT576868.1	96	12272	12198
108	LT576870.1	96	13842	13768
108	LT576869.1	96	16113	16039
108	LT576867.1	94.67	17742	17668
109	LT576869.1	98.67	37448	37522
109	LT576868.1	98.67	32960	33034
109	X14112.1	98.67	38760	38834
109	LT576867.1	98.67	38427	38501
109	JN555585.1	98.67	38761	38835
109	LT608134.1	98.67	33920	33994
109	LT576870.1	98.67	34534	34608
109	LT594108.1	98.67	38565	38639
109	LT576871.1	98.67	37116	37190
109	LT594192.1	98.67	38537	38611
110	LT594108.1	98.67	111036	110962
110	LT576868.1	97.33	105389	105315
110	LT608134.1	97.33	108770	108696
110	LT576867.1	97.33	111118	111044
110	JN555585.1	97.33	111305	111231
110	LT576869.1	97.33	110016	109942
110	LT594192.1	97.33	110863	110789
110	LT576870.1	97.33	107007	106933
110	X14112.1	97.33	111304	111230
110	LT576871.1	97.33	111429	111355
111	LT594108.1	98.67	111043	110969
111	LT594192.1	97.33	110870	110796
111	LT576869.1	97.33	110023	109949
111	LT608134.1	97.33	108777	108703
111	LT576870.1	97.33	107014	106940
111	X14112.1	97.33	111311	111237
111	LT576871.1	97.33	111436	111362
111	LT576868.1	97.33	105396	105322
111	JN555585.1	97.33	111312	111238
111	LT576867.1	96	111125	111051
112	LT576869.1	98.65	112646	112719
112	LT576868.1	98.65	108016	108089
112	LT608134.1	98.65	111631	111704
112	LT594192.1	98.65	113493	113566
112	LT594108.1	98.65	113666	113739
112	JN555585.1	98.65	113935	114008
112	LT576871.1	98.65	114059	114132
112	X14112.1	98.65	113934	114007
112	LT576870.1	98.65	109637	109710
112	LT576867.1	97.3	113748	113821
113	LT594192.1	98.67	36928	36854
113	LT576868.1	98.67	31351	31277
113	LT576871.1	98.67	35507	35433
113	LT608134.1	98.67	32311	32237
113	LT594108.1	98.67	36956	36882
113	LT576869.1	98.67	35838	35764
113	LT576867.1	98.67	36818	36744
113	LT576870.1	98.67	32925	32851
113	X14112.1	97.33	37151	37077
113	JN555585.1	97.33	37152	37078
114	LT594192.1	98.67	145364	145290
114	LT576871.1	98.67	125228	125302
114	LT576870.1	98.67	125946	126020
114	LT576867.1	98.67	124118	124192
114	LT594192.1	98.67	130785	130859
114	LT594108.1	98.67	131108	131182
114	LT594108.1	98.67	145783	145709
114	LT576869.1	98.67	123099	123173
114	X14112.1	97.37	146465	146390
114	JN555585.1	97.37	131771	131846
114	JN555585.1	97.37	146426	146351
114	X14112.1	97.37	131768	131843
114	LT608134.1	98.44	139811	139748
115	X14112.1	100	13157	13230
115	LT576869.1	100	11204	11277
115	JN555585.1	100	13158	13231
115	LT594108.1	100	12958	13031
115	LT608134.1	100	6393	6466
115	LT576871.1	100	8160	8233
115	LT576868.1	100	7364	7437
115	LT576867.1	100	12834	12907
115	LT594192.1	100	12937	13010
115	LT576870.1	100	8934	9007
116	LT594108.1	98.67	101768	101842
116	LT576868.1	98.67	96122	96196
116	LT576867.1	98.67	101847	101921
116	LT608134.1	98.65	99063	99136
116	LT576869.1	98.65	100749	100822
116	X14112.1	98.65	102041	102114
116	LT576870.1	98.65	97745	97818
116	LT576871.1	98.65	101615	101688
116	JN555585.1	98.65	102042	102115
116	LT594192.1	98.65	101598	101671
117	LT594192.1	98.67	11084	11158
117	LT576867.1	98.67	10975	11049
117	LT576869.1	98.67	9352	9426
117	LT576868.1	98.67	5509	5583
117	JN555585.1	98.67	11305	11379
117	LT608134.1	98.67	4294	4368
117	LT576871.1	98.67	6308	6382
117	LT576871.1	98.67	5698	5772
117	LT594108.1	98.67	11106	11180
117	X14112.1	98.67	11304	11378
117	LT576870.1	98.67	7082	7156
117	LT608134.1	100	3660	3726
118	LT576867.1	98.67	31530	31604
118	JN555585.1	98.67	31853	31927
118	LT576868.1	98.67	26053	26127
118	LT608134.1	98.67	26000	26074
118	LT594192.1	98.67	31629	31703
118	X14112.1	98.67	31852	31926
118	LT594108.1	98.67	31658	31732
118	LT576871.1	98.67	29741	29815
118	LT576870.1	97.33	27628	27702
118	LT576869.1	97.33	30539	30613
118	LT576869.1	97.33	29904	29978
119	X14112.1	98.67	135789	135715
119	LT576868.1	98.67	122177	122103
119	LT576869.1	98.67	127036	126962
119	LT594108.1	98.67	135129	135055
119	LT608134.1	98.67	128153	128079
119	JN555585.1	98.67	135792	135718
119	LT576870.1	98.67	129883	129809
119	LT608134.1	98.67	127559	127485
119	LT594192.1	98.67	134797	134723
119	LT576871.1	98.67	129252	129178
119	LT576867.1	97.33	128059	127985
120	X14112.1	98.67	35163	35237
120	LT608134.1	98.67	29733	29807
120	LT576869.1	98.67	33849	33923
120	LT576870.1	98.67	30936	31010
120	LT576867.1	98.67	34829	34903
120	LT576871.1	98.67	33517	33591
120	JN555585.1	98.67	35164	35238
120	LT594192.1	98.67	34940	35014
120	LT594108.1	97.33	34967	35041
120	LT576868.1	97.33	29362	29436
121	X14112.1	100	54169	54241
121	LT576870.1	100	49939	50011
121	LT608134.1	100	49695	49767
121	LT576869.1	100	53070	53142
121	LT594108.1	100	53964	54036
121	LT576871.1	100	53100	53172
121	LT576868.1	100	48369	48441
121	JN555585.1	100	54170	54242
121	LT576867.1	100	53822	53894
121	LT594192.1	98.63	53946	54018
122	LT576868.1	98.67	52193	52267
122	LT576867.1	98.67	57649	57723
122	LT576869.1	98.67	56895	56969
122	LT594192.1	98.67	57771	57845
122	JN555585.1	98.67	57995	58069
122	LT608134.1	98.67	53520	53594
122	LT576871.1	98.67	56925	56999
122	X14112.1	98.67	57994	58068
122	LT576870.1	98.67	53764	53838
122	LT594108.1	97.33	57789	57863
123	JN555585.1	98.67	18119	18193
123	X14112.1	98.67	18118	18192
123	LT576868.1	97.33	12325	12399
123	LT576867.1	97.33	17795	17868
123	LT594108.1	94.74	17919	17994
123	LT576871.1	94.74	13695	13770
123	LT608134.1	94.74	11678	11753
123	LT594192.1	93.51	17898	17974
123	LT576870.1	91.03	13895	13972
124	LT594108.1	98.63	37447	37375
124	LT576869.1	98.63	36330	36258
124	LT576871.1	98.63	35998	35926
124	LT576868.1	98.63	31842	31770
124	JN555585.1	98.63	37643	37571
124	LT608134.1	98.63	32802	32730
124	LT594192.1	98.63	37419	37347
124	X14112.1	98.63	37642	37570
124	LT576870.1	98.63	33416	33344
124	LT576867.1	98.63	37309	37237
125	LT608134.1	98.67	56914	56988
125	LT576868.1	98.67	55602	55676
125	LT576871.1	98.67	60319	60393
125	LT594108.1	98.67	61198	61272
125	LT576867.1	97.33	61058	61132
125	LT576870.1	96	57157	57231
125	LT594192.1	96	61180	61254
125	X14112.1	96	61403	61477
125	LT576869.1	96	60289	60363
125	JN555585.1	96	61404	61478
126	LT576871.1	98.67	20863	20937
126	LT576868.1	98.67	18943	19017
126	X14112.1	98.67	24742	24815
126	LT594108.1	98.67	24544	24617
126	JN555585.1	98.67	24743	24816
126	LT576867.1	98.67	24418	24491
126	LT594192.1	97.33	24519	24592
126	LT608134.1	97.33	18886	18959
126	LT576870.1	97.33	20519	20592
127	LT576871.1	100	30062	29993
127	LT576870.1	100	27949	27880
127	LT576869.1	100	30860	30791
127	LT594108.1	100	31979	31910
127	LT576868.1	100	26374	26305
127	LT576867.1	100	31851	31782
127	LT608134.1	100	26321	26252
127	LT594192.1	100	31950	31881
127	JN555585.1	98.57	32174	32105
127	X14112.1	98.57	32173	32104
128	LT594108.1	96	4169	4243
128	JN555585.1	96	122078	122004
128	X14112.1	96	4295	4369
128	LT594108.1	96	121730	121656
128	X14112.1	96	122076	122002
128	JN555585.1	96	4296	4370
128	LT576867.1	94.67	3946	4020
128	LT594192.1	94.67	4230	4304
128	LT576870.1	94.67	116200	116126
128	LT576869.1	94.67	2441	2515
128	LT594192.1	94.67	121497	121423
129	LT594108.1	100	20249	20179
129	LT576868.1	100	14655	14585
129	LT576867.1	100	20123	20053
129	LT576869.1	100	18498	18428
129	JN555585.1	100	20448	20378
129	LT576871.1	100	16025	15955
129	X14112.1	100	20447	20377
129	LT608134.1	100	14008	13938
129	LT576870.1	100	16227	16157
129	LT594192.1	100	20229	20159
130	JN555585.1	100	115407	115477
130	X14112.1	100	115406	115476
130	LT576868.1	98.59	109488	109558
130	LT594192.1	98.59	114965	115035
130	LT594108.1	98.59	115138	115208
130	LT576869.1	98.59	114119	114189
130	LT608134.1	98.59	113103	113173
130	LT576870.1	98.59	111109	111179
130	LT576871.1	98.59	115531	115601
130	LT576867.1	95.77	115222	115292
131	X14112.1	100	42480	42410
131	LT576870.1	100	38250	38180
131	LT576869.1	100	41377	41307
131	LT576868.1	100	36683	36613
131	LT576867.1	100	42147	42077
131	JN555585.1	100	42481	42411
131	LT594192.1	100	42255	42185
131	LT576871.1	98.59	40831	40761
131	LT608134.1	98.59	37634	37564
131	LT594108.1	98.59	42281	42211
132	LT594192.1	100	128414	128346
132	X14112.1	100	129406	129338
132	X14112.1	100	148827	148895
132	LT594108.1	100	148145	148213
132	LT576867.1	100	121749	121681
132	LT576870.1	100	142463	142531
132	JN555585.1	100	129409	129341
132	LT594108.1	100	128746	128678
132	JN555585.1	100	148788	148856
132	LT576869.1	100	138910	138978
132	LT594192.1	100	147735	147803
133	LT576867.1	100	82028	81960
133	LT576868.1	100	76321	76253
133	JN555585.1	100	82228	82160
133	X14112.1	100	82228	82160
133	LT576871.1	100	81343	81275
133	LT608134.1	100	78012	77944
133	LT594108.1	100	81951	81883
133	LT594192.1	98.55	81795	81727
133	LT576870.1	97.1	77935	77867
133	LT576869.1	97.1	80936	80868
134	LT594192.1	94.67	83642	83568
134	LT576868.1	94.67	78168	78094
134	LT576867.1	94.67	83876	83802
134	JN555585.1	94.67	84075	84001
134	X14112.1	94.67	84075	84001
134	LT594108.1	94.67	83798	83724
134	LT608134.1	94.67	80272	80198
134	LT576871.1	94.67	83190	83116
134	LT576870.1	94.67	79782	79708
134	LT576869.1	94.67	82783	82709
135	X14112.1	97.33	147298	147225
135	LT576867.1	97.33	123284	123357
135	LT576870.1	97.33	125115	125188
135	LT576870.1	97.33	140925	140852
135	LT576870.1	97.33	124444	124517
135	LT594192.1	97.33	129952	130025
135	LT594108.1	97.33	130275	130348
135	LT576869.1	97.33	122266	122339
135	LT594108.1	97.33	146616	146543
135	JN555585.1	97.33	130938	131011
135	LT576871.1	97.33	124399	124472
135	LT608134.1	97.33	141370	141297
135	LT594192.1	97.33	146197	146124
135	JN555585.1	97.33	147259	147186
135	LT576869.1	97.33	137830	137757
135	X14112.1	97.33	130935	131008
135	LT576868.1	96	117397	117470
136	LT576871.1	94.67	83105	83179
136	LT576869.1	94.67	82698	82772
136	LT576870.1	94.67	79697	79771
136	LT594192.1	94.67	83557	83631
136	LT576868.1	94.67	78083	78157
136	LT576867.1	94.67	83791	83865
136	X14112.1	94.67	83990	84064
136	LT594108.1	94.67	83713	83787
136	JN555585.1	94.67	83990	84064
136	LT608134.1	94.67	80187	80261
137	LT576868.1	100	16288	16221
137	LT608134.1	100	16230	16163
137	X14112.1	100	22082	22015
137	LT576869.1	100	20130	20063
137	JN555585.1	100	22083	22016
137	LT576867.1	100	21756	21689
137	LT576870.1	100	17859	17792
137	LT594192.1	100	21863	21796
137	LT576871.1	100	18206	18139
137	LT594108.1	100	21884	21817
138	LT594108.1	97.18	4099	4029
138	LT594108.1	97.18	121800	121870
138	LT594192.1	97.18	121567	121637
138	JN555585.1	97.18	122148	122218
138	X14112.1	97.18	122146	122216
138	LT594192.1	97.18	4160	4090
138	X14112.1	97.18	4225	4155
138	JN555585.1	97.18	4226	4156
138	LT576869.1	95.77	2371	2301
138	LT576867.1	95.77	3876	3806
138	LT576870.1	95.77	117252	117322
138	LT576870.1	95.59	116272	116339
139	LT576867.1	100	22579	22646
139	JN555585.1	100	22906	22973
139	LT594108.1	100	22707	22774
139	LT576870.1	100	18682	18749
139	LT576871.1	100	19029	19096
139	LT576868.1	100	17111	17178
139	LT576869.1	100	20953	21020
139	X14112.1	100	22905	22972
139	LT608134.1	100	17053	17120
139	LT594192.1	100	22686	22753
140	LT594108.1	100	58012	58077
140	LT594192.1	100	57994	58059
140	JN555585.1	98.48	58218	58283
140	LT576868.1	98.48	52416	52481
140	X14112.1	98.48	58217	58282
140	LT608134.1	94.37	53728	53798
140	LT576869.1	94.37	57103	57173
140	LT576870.1	94.37	53972	54042
140	LT576871.1	94.37	57133	57203
140	LT576867.1	98.46	57872	57936
141	LT594108.1	98.55	118464	118396
141	LT594192.1	98.55	118260	118192
141	LT594192.1	98.55	7467	7535
141	LT594108.1	98.55	7435	7503
141	LT576870.1	97.1	113058	112990
141	LT576871.1	97.1	2414	2482
141	LT576870.1	97.1	3456	3524
141	LT576868.1	97.1	112350	112282
141	LT576867.1	97.1	7276	7344
141	LT608134.1	97.1	116917	116849
141	LT576869.1	97.1	5681	5749
141	X14112.1	95.65	118816	118748
141	JN555585.1	95.65	7557	7625
141	X14112.1	95.65	7555	7623
141	JN555585.1	95.65	118817	118749
141	LT576871.1	95.71	118825	118756
142	LT608134.1	100	136155	136219
142	X14112.1	100	142380	142444
142	LT576871.1	100	136484	136548
142	LT576870.1	100	136482	136546
142	LT594108.1	100	141769	141833
142	LT576869.1	100	133637	133701
142	LT576868.1	100	129314	129378
142	JN555585.1	100	142384	142448
142	LT594192.1	100	141367	141431
142	LT576867.1	98.46	134756	134820
143	X14112.1	100	132322	132386
143	JN555585.1	100	132325	132389
143	LT576869.1	100	123652	123716
143	LT594108.1	100	145230	145166
143	X14112.1	100	145911	145847
143	LT576870.1	100	126499	126563
143	LT576870.1	100	140142	140078
143	LT594108.1	100	131661	131725
143	JN555585.1	100	145872	145808
143	LT576869.1	100	137017	136953
143	LT576868.1	98.48	118293	118358
143	LT576871.1	98.46	125770	125833
143	LT608134.1	98.46	123612	123675
143	LT594192.1	98.46	131326	131389
143	LT594192.1	98.46	144823	144760
144	LT608134.1	98.46	139033	139097
144	LT576869.1	98.46	136375	136439
144	LT576870.1	98.46	139500	139564
144	LT594108.1	98.46	144504	144568
144	X14112.1	98.46	145145	145209
144	LT576868.1	98.46	131972	132036
144	LT594192.1	98.46	144098	144162
144	JN555585.1	98.46	145150	145214
144	LT576867.1	98.46	137862	137926
144	LT576871.1	98.46	139133	139197
145	JN555585.1	100	21174	21237
145	LT594192.1	100	20954	21017
145	X14112.1	100	21173	21236
145	LT594108.1	100	20975	21038
145	LT576869.1	100	19221	19282
145	LT576871.1	100	16749	16810
145	LT576868.1	100	15379	15440
145	LT576870.1	100	16950	17011
145	LT576867.1	100	20847	20908
145	LT608134.1	100	14732	14793
146	LT594108.1	98.46	133942	134006
146	LT576870.1	98.46	128697	128761
146	JN555585.1	98.46	134606	134670
146	LT594192.1	98.46	133610	133674
146	LT576867.1	98.46	126873	126937
146	LT576869.1	98.46	125850	125914
146	LT608134.1	98.46	126373	126437
146	X14112.1	98.46	134603	134667
146	LT576871.1	98.46	128066	128130
146	LT576868.1	98.46	120991	121055
147	JN555585.1	100	31463	31525
147	LT576868.1	100	25663	25725
147	X14112.1	100	31462	31524
147	LT576867.1	100	31140	31202
147	LT576871.1	100	29351	29413
147	LT608134.1	100	25610	25672
147	LT576869.1	100	30149	30210
147	LT576869.1	100	29514	29575
147	LT576870.1	100	27238	27299
147	LT594108.1	98.41	31268	31330
147	LT594192.1	98.41	31239	31301
148	LT576868.1	100	89321	89381
148	LT576870.1	100	90938	90998
148	LT608134.1	100	92260	92320
148	LT594108.1	100	94962	95022
148	X14112.1	100	95234	95294
148	LT576869.1	100	93941	94001
148	LT576871.1	100	94812	94872
148	JN555585.1	100	95234	95294
148	LT594192.1	100	94794	94854
148	LT576867.1	100	95033	95093
149	LT608134.1	100	93495	93435
149	LT594108.1	100	96197	96137
149	LT576871.1	100	96047	95987
149	LT576868.1	100	90554	90494
149	LT576869.1	100	95175	95115
149	X14112.1	100	96467	96407
149	JN555585.1	100	96468	96408
149	LT576870.1	100	92172	92112
149	LT594192.1	100	96028	95968
149	LT576867.1	98.36	96268	96208
150	LT594108.1	100	134281	134340
150	X14112.1	98.33	134942	135001
150	LT576870.1	98.33	129036	129095
150	LT608134.1	98.33	126712	126771
150	LT576867.1	98.33	127212	127271
150	LT576869.1	98.33	126189	126248
150	LT576871.1	98.33	128405	128464
150	JN555585.1	98.33	134945	135004
150	LT576868.1	98.33	121330	121389
150	LT594192.1	98.33	133949	134008
151	LT594108.1	100	146713	146771
151	LT576871.1	100	124302	124244
151	LT576869.1	100	122169	122111
151	LT576870.1	100	124347	124289
151	JN555585.1	100	147356	147414
151	X14112.1	100	130838	130780
151	X14112.1	100	147395	147453
151	LT576869.1	100	137927	137985
151	LT594108.1	100	130178	130120
151	JN555585.1	100	130841	130783
151	LT594192.1	100	129855	129797
151	LT608134.1	100	141467	141525
151	LT576870.1	100	141022	141080
151	LT594192.1	100	146294	146352
151	LT576867.1	100	123187	123129
152	JN555585.1	100	111194	111135
152	LT576870.1	100	106896	106837
152	X14112.1	100	111193	111134
152	LT608134.1	100	108659	108600
152	LT594108.1	100	110925	110866
152	LT576871.1	100	111318	111259
152	LT576869.1	100	109905	109846
152	LT594192.1	100	110752	110693
152	LT576868.1	100	105278	105219
152	LT576867.1	100	111007	110948
153	LT576869.1	100	92459	92400
153	LT594108.1	100	93480	93421
153	LT576868.1	100	87840	87781
153	LT608134.1	100	90779	90720
153	LT576867.1	100	93551	93492
153	JN555585.1	100	93754	93695
153	LT576871.1	100	93331	93272
153	X14112.1	100	93755	93696
153	LT594192.1	100	93313	93254
153	LT576870.1	100	89457	89398
154	LT576871.1	100	110867	110809
154	LT608134.1	100	108208	108150
154	LT576869.1	100	109454	109396
154	LT576870.1	100	106445	106387
154	X14112.1	100	110742	110684
154	LT576867.1	100	110556	110498
154	LT576868.1	100	104827	104769
154	JN555585.1	100	110743	110685
154	LT594192.1	100	110301	110243
154	LT594108.1	100	110474	110416
155	LT594108.1	98.36	10673	10613
155	LT576870.1	96.72	6649	6589
155	LT576869.1	96.72	8919	8859
155	LT594192.1	96.72	10651	10591
156	JN555585.1	100	137791	137733
156	X14112.1	100	137788	137730
156	LT576871.1	100	131251	131193
156	LT576869.1	100	129037	128979
156	LT576867.1	100	130059	130001
156	LT608134.1	100	131116	131058
156	LT594108.1	100	137130	137072
156	LT576868.1	100	124176	124118
156	LT576870.1	100	131882	131824
157	LT594108.1	100	125460	125404
157	LT594192.1	100	417	473
157	LT594108.1	100	439	495
157	LT594192.1	100	125310	125254
158	X14112.1	100	7341	7399

## Sheet: Human polyomavirus 2
Reads number	Reference	Identity	Start	End
1	LT615219.1	100	942	868
1	LT615223.1	98.67	942	868
1	J02226.1	98.67	4562	4488
1	LT615221.1	98.67	942	868
1	LT615220.1	98.67	940	866
1	LT615222.1	98.67	942	868
2	LT615219.1	100	3968	4042
3	J02226.1	100	3613	3687
4	LT615220.1	100	1764	1838
4	LT615223.1	100	1705	1779
4	LT615219.1	100	1789	1863
4	J02226.1	100	275	349
4	LT615221.1	100	1846	1920
4	LT615222.1	100	1898	1972
5	J02226.1	100	3072	3146
5	LT615219.1	100	4586	4660
5	LT615223.1	98.67	4503	4577
5	LT615220.1	98.67	4561	4635
5	LT615222.1	98.67	4695	4769
5	LT615221.1	98.67	4643	4717
6	J02226.1	98.67	292	218
6	LT615219.1	98.67	1806	1732
7	LT615223.1	100	1726	1800
7	LT615220.1	100	1785	1859
7	LT615222.1	100	1919	1993
7	J02226.1	100	296	370
7	LT615219.1	100	1810	1884
7	LT615221.1	100	1867	1941
8	LT615219.1	100	4792	4866
8	J02226.1	98.67	3278	3352
8	LT615223.1	98.67	4709	4783
8	LT615222.1	98.67	4901	4975
8	LT615220.1	98.67	4767	4841
8	LT615221.1	98.67	4849	4923
9	LT615219.1	98.67	910	984
9	LT615221.1	97.33	910	984
9	LT615223.1	97.33	910	984
9	LT615220.1	97.33	908	982
9	LT615222.1	97.33	910	984
9	J02226.1	97.33	4530	4604
10	LT615219.1	100	1867	1941
10	LT615223.1	100	1783	1857
10	LT615222.1	100	1976	2050
10	LT615221.1	100	1924	1998
10	LT615220.1	100	1842	1916
10	J02226.1	100	353	427
11	LT615219.1	100	122	48
11	J02226.1	98.67	3742	3668
11	LT615220.1	98.67	120	46
11	LT615221.1	98.67	122	48
11	LT615222.1	98.67	122	48
11	LT615223.1	98.67	122	48
12	LT615219.1	100	2710	2636
12	LT615223.1	98.67	2627	2553
12	J02226.1	98.67	1196	1122
12	LT615221.1	98.67	2767	2693
12	LT615222.1	98.67	2819	2745
12	LT615220.1	98.67	2685	2611
13	LT615219.1	100	4849	4775
13	LT615221.1	98.67	4906	4832
13	LT615222.1	98.67	4958	4884
13	LT615220.1	98.67	4824	4750
13	J02226.1	98.67	3335	3261
13	LT615223.1	98.67	4766	4692
14	LT615219.1	100	4096	4022
14	J02226.1	98.67	2582	2508
14	LT615220.1	98.67	4071	3997
15	LT615220.1	98.67	1665	1739
16	LT615219.1	100	1826	1900
16	LT615221.1	100	1883	1957
16	LT615220.1	100	1801	1875
16	LT615223.1	100	1742	1816
16	LT615222.1	100	1935	2009
16	J02226.1	100	312	386
17	LT615219.1	98.67	2557	2483
18	LT615220.1	98.67	2266	2192
18	LT615221.1	98.67	2348	2274
18	LT615222.1	98.67	2400	2326
18	J02226.1	98.67	777	703
18	LT615223.1	98.67	2208	2134
18	LT615219.1	97.33	2291	2217
19	LT615219.1	98.67	1090	1164
20	LT615219.1	98.67	2520	2594
21	LT615219.1	98.67	1340	1414
22	LT615221.1	98.67	3171	3097
22	LT615223.1	98.67	3031	2957
22	LT615220.1	98.67	3089	3015
22	LT615222.1	98.67	3223	3149
22	J02226.1	98.67	1600	1526
22	LT615219.1	98.67	3114	3040
23	LT615219.1	98.67	3682	3756
24	LT615219.1	98.67	3966	3892
24	LT615220.1	97.33	3941	3867
24	LT615221.1	97.33	4023	3949
24	LT615222.1	97.33	4075	4001
24	LT615223.1	97.33	3883	3809
24	J02226.1	97.33	2452	2378
25	LT615219.1	100	5050	5123
26	LT615219.1	97.33	3329	3403
27	LT615219.1	98.67	4711	4637
28	LT615219.1	98.67	549	475
28	J02226.1	97.33	4169	4095
28	LT615223.1	97.33	549	475
28	LT615221.1	97.33	549	475
28	LT615222.1	97.33	549	475
28	LT615220.1	97.33	547	473
29	LT615222.1	98.67	1159	1233
29	J02226.1	98.67	4779	4853
29	LT615223.1	98.67	1159	1233
29	LT615221.1	98.67	1159	1233
29	LT615219.1	98.67	1159	1233
29	LT615220.1	98.67	1157	1231
30	LT615219.1	98.67	133	207
31	LT615219.1	97.33	2844	2918
32	LT615219.1	98.67	2578	2652
33	LT615219.1	98.67	4790	4864
34	LT615219.1	98.67	4501	4427
35	LT615219.1	97.33	1246	1172
36	LT615219.1	98.65	5151	5078

## Sheet: Aspergillus flavus
Reads number	Reference	Identity	Start	End
1	CP059870.1	100	327435	327509
2	CP059872.1	100	3013250	3013324
2	CP059872.1	100	3028842	3028916
2	CP059872.1	100	2982066	2982140
2	CP059872.1	100	2989862	2989936
2	CP059872.1	100	3021046	3021120
2	CP059872.1	100	2974270	2974344
2	CP059872.1	100	3005454	3005528
2	CP059872.1	100	2997658	2997732
2	CP059872.1	100	2966474	2966548
3	CP059868.1	100	3300410	3300336
4	CP059869.1	100	2091586	2091512
5	CP059867.1	100	91722	91648
6	CP059866.1	100	2302242	2302316
7	CP059872.1	100	830529	830455
8	CP059866.1	100	1059051	1058977
9	CP059870.1	100	1957984	1958058
10	CP059871.1	100	1168004	1168078
11	CP059867.1	100	5873844	5873770
12	CP059871.1	100	677704	677778
13	CP059869.1	100	555373	555299
14	CP059868.1	100	2008126	2008200
15	CP059868.1	100	2864045	2864119
16	CP059866.1	100	4448706	4448780
17	CP059871.1	100	3114775	3114701
18	CP059872.1	100	357652	357578
19	CP059873.1	100	391229	391155
20	CP059871.1	100	1274847	1274773
21	CP059870.1	100	1295710	1295636
22	CP059868.1	100	2763954	2764028
23	CP059872.1	100	3004413	3004339
23	CP059872.1	100	2996617	2996543
23	CP059872.1	100	2981025	2980951
23	CP059872.1	100	2965433	2965359
23	CP059872.1	100	2973229	2973155
23	CP059872.1	100	3020005	3019931
23	CP059872.1	100	3012209	3012135
23	CP059872.1	100	3027801	3027727
23	CP059872.1	100	2988821	2988747
24	CP059868.1	100	2763954	2764028
25	CP059870.1	100	3710859	3710933
26	CP059868.1	100	2202721	2202647
27	CP059869.1	100	1325615	1325689
28	CP059866.1	100	5701801	5701727
29	CP059872.1	100	2166591	2166665
30	CP059869.1	100	2287261	2287187
31	CP059869.1	100	3421745	3421671
32	CP059869.1	100	1186920	1186846
33	CP059866.1	100	5213752	5213826
34	CP059866.1	100	2032436	2032362
35	CP059871.1	100	1168004	1168078
36	CP059872.1	100	1419970	1419896
37	CP059871.1	100	3794484	3794410
38	CP059872.1	100	2121113	2121187
39	CP059867.1	100	2829054	2828980
40	CP059866.1	100	4709357	4709431
41	CP059867.1	100	5529395	5529321
42	CP059866.1	100	1177573	1177647
43	CP059867.1	100	1163539	1163465
44	CP059867.1	100	4622860	4622786
45	CP059868.1	100	2562935	2562861
46	CP059869.1	100	4503168	4503094
47	CP059868.1	100	2205996	2206070
48	CP059871.1	100	188100	188026
49	CP059870.1	100	2369472	2369546
50	CP059870.1	100	2510451	2510525
51	CP059867.1	100	4742416	4742342
52	CP059869.1	100	2922032	2922106
53	CP059867.1	100	199955	200029
54	CP059866.1	100	5130921	5130847
55	CP059866.1	100	889270	889196
56	CP059867.1	100	4268514	4268440
57	CP059867.1	100	932230	932304
58	CP059868.1	100	4456762	4456836
59	CP059872.1	100	879798	879724
60	CP059873.1	100	1766734	1766808
61	CP059871.1	100	3761352	3761426
62	CP059871.1	100	2666746	2666672
63	CP059872.1	100	2927052	2927126
64	CP059869.1	100	2082025	2081951
65	CP059866.1	100	2189979	2189905
66	CP059868.1	100	2481896	2481822
67	CP059871.1	100	1080363	1080437
68	CP059867.1	100	3596052	3596126
69	CP059871.1	100	2700209	2700135
70	CP059868.1	100	1798505	1798579
71	CP059867.1	100	4474374	4474448
72	CP059873.1	100	1025812	1025738
73	CP059866.1	100	2196567	2196493
74	CP059870.1	100	759904	759978
75	CP059868.1	100	2630178	2630104
76	CP059873.1	100	3050428	3050354
77	CP059866.1	100	2005856	2005930
78	CP059866.1	100	1807150	1807224
79	CP059867.1	100	5971248	5971322
80	CP059868.1	100	3945131	3945057
81	CP059870.1	100	1694633	1694559
82	CP059866.1	100	4309360	4309434
83	CP059872.1	100	426517	426443
84	CP059870.1	100	2627525	2627599
85	CP059873.1	100	944456	944382
86	CP059868.1	100	289229	289303
87	CP059873.1	100	1395415	1395489
88	CP059867.1	100	2489782	2489856
89	CP059871.1	100	1530750	1530676
90	CP059867.1	100	597920	597994
91	CP059871.1	100	2151524	2151598
92	CP059868.1	100	3834018	3834092
93	CP059869.1	100	343441	343515
94	CP059871.1	100	3184056	3183982
95	CP059873.1	100	266271	266197
96	CP059867.1	100	2489782	2489856
97	CP059866.1	100	3468808	3468734
98	CP059866.1	100	5269713	5269639
99	CP059872.1	100	324674	324600
100	CP059871.1	100	2151524	2151598
101	CP059870.1	100	3019343	3019269
102	CP059867.1	100	5469548	5469622
103	CP059870.1	100	4151385	4151311
104	CP059867.1	100	3876418	3876344
105	CP059869.1	100	1097946	1097872
106	CP059867.1	100	5187756	5187682
107	CP059871.1	100	1394396	1394470
108	CP059866.1	100	2606541	2606467
109	CP059870.1	100	4388334	4388408
110	CP059866.1	100	1579531	1579457
111	CP059868.1	100	2583951	2583877
112	CP059870.1	100	4257743	4257817
113	CP059872.1	100	1319958	1319884
114	CP059866.1	100	5636240	5636166
115	CP059868.1	100	195768	195694
116	CP059872.1	100	1276725	1276799
117	CP059868.1	100	1468540	1468467
118	CP059869.1	100	2082025	2081951
119	CP059867.1	100	5654458	5654384
120	CP059868.1	100	1268387	1268461
121	CP059868.1	100	4220202	4220276
122	CP059873.1	100	3121965	3121891
123	CP059869.1	100	2811893	2811819
124	CP059873.1	100	2184559	2184633
125	CP059866.1	100	1127156	1127082
126	CP059870.1	100	1623130	1623204
127	CP059868.1	100	1491161	1491087
128	CP059871.1	100	3629437	3629511
129	CP059870.1	100	3486032	3485958
130	CP059868.1	100	3333393	3333467
131	CP059868.1	100	5007760	5007686
132	CP059868.1	100	180659	180733
133	CP059870.1	100	1739238	1739164
134	CP059867.1	100	1583241	1583315
135	CP059870.1	100	1106911	1106985
136	CP059866.1	100	4957105	4957179
137	CP059866.1	100	2398724	2398650
138	CP059869.1	100	2196914	2196988
139	CP059866.1	100	4952673	4952747
140	CP059868.1	100	453775	453849
141	CP059870.1	100	4007797	4007871
142	CP059866.1	100	1818844	1818918
143	CP059870.1	100	4128877	4128951
144	CP059867.1	100	1299362	1299288
145	CP059871.1	100	338642	338568
146	CP059871.1	100	536512	536438
147	CP059867.1	100	3100801	3100874
148	CP059866.1	100	4956498	4956424
149	CP059868.1	100	3465356	3465430
150	CP059869.1	100	1072464	1072390
151	CP059871.1	100	186043	186117
152	CP059868.1	100	3871883	3871957
153	CP059870.1	100	2059474	2059400
154	CP059870.1	100	1239852	1239926
155	CP059872.1	100	1680602	1680676
156	CP059866.1	100	3886188	3886262
157	CP059867.1	100	5223858	5223784
158	CP059872.1	98.67	241967	242041
159	CP059872.1	100	2731035	2731109
160	CP059871.1	100	1355655	1355581
161	CP059873.1	100	2928950	2928876
162	CP059866.1	100	4675532	4675458
163	CP059871.1	100	248627	248701
164	CP059869.1	100	2757774	2757700
165	CP059868.1	100	2285257	2285331
166	CP059866.1	100	4420862	4420936
167	CP059868.1	100	2208447	2208521
168	CP059870.1	100	540191	540265
169	CP059868.1	100	453775	453849
170	CP059870.1	100	3971519	3971593
171	CP059866.1	100	4220790	4220864
172	CP059867.1	100	2857064	2857138
173	CP059867.1	98.67	6158172	6158098
174	CP059868.1	100	4348531	4348457
175	CP059871.1	100	1377991	1378065
176	CP059866.1	100	6340572	6340498
177	CP059867.1	100	4205781	4205855
178	CP059866.1	100	4280103	4280029
179	CP059867.1	100	6033287	6033213
180	CP059868.1	100	2879216	2879290
181	CP059872.1	100	2159789	2159863
182	CP059870.1	100	2002128	2002054
183	CP059868.1	100	2285257	2285331
184	CP059870.1	100	3101192	3101119
185	CP059870.1	100	359086	359012
186	CP059870.1	100	3476996	3477070
187	CP059872.1	100	1897688	1897614
188	CP059872.1	100	1339411	1339485
189	CP059872.1	100	2927196	2927122
190	CP059869.1	100	1129266	1129340
191	CP059866.1	100	5224876	5224802
192	CP059870.1	100	540191	540265
193	CP059871.1	100	1917986	1918060
194	CP059866.1	100	5429684	5429610
195	CP059868.1	100	3842052	3842126
196	CP059871.1	100	1516519	1516593
197	CP059873.1	100	2591287	2591361
198	CP059872.1	100	1387438	1387364
199	CP059870.1	100	3583258	3583332
200	CP059867.1	100	998607	998533
201	CP059872.1	100	2647578	2647504
202	CP059866.1	100	5320677	5320603
203	CP059866.1	100	889132	889205
204	CP059866.1	100	740638	740712
205	CP059869.1	100	4538622	4538548
206	CP059867.1	100	1677261	1677187
207	CP059866.1	100	3015627	3015701
208	CP059868.1	100	3207805	3207731
209	CP059868.1	100	1522089	1522015
210	CP059868.1	100	4902222	4902296
211	CP059866.1	100	1073620	1073547
212	CP059870.1	100	3162298	3162224
213	CP059866.1	100	952903	952829
214	CP059867.1	100	1852586	1852512
215	CP059866.1	100	6069380	6069453
216	CP059873.1	100	2264122	2264048
217	CP059873.1	100	2113886	2113812
218	CP059867.1	98.67	3692237	3692311
219	CP059869.1	98.67	653556	653630
220	CP059866.1	100	6114618	6114544
221	CP059867.1	100	3905619	3905693
222	CP059867.1	100	6034750	6034823
223	CP059867.1	100	4439372	4439298
224	CP059869.1	100	346237	346311
225	CP059866.1	100	3282246	3282319
226	CP059868.1	100	3272736	3272810
227	CP059869.1	100	1097946	1097873
228	CP059870.1	98.67	4179794	4179868
229	CP059867.1	98.67	2706381	2706455
230	CP059869.1	100	982482	982408
231	CP059873.1	98.67	383874	383800
232	CP059871.1	100	2211912	2211838
233	CP059867.1	100	1852586	1852512
234	CP059869.1	100	2468164	2468238
235	CP059867.1	100	2734190	2734116
236	CP059867.1	100	3098093	3098166
237	CP059868.1	100	5071403	5071330
238	CP059869.1	100	1721914	1721988
239	CP059867.1	100	3155293	3155367
240	CP059869.1	100	4128651	4128577
241	CP059867.1	100	4518437	4518510
242	CP059870.1	100	3862451	3862377
243	CP059866.1	98.67	4236052	4236126
244	CP059870.1	98.67	1193792	1193866
245	CP059866.1	100	1017327	1017401
246	CP059869.1	100	3393249	3393322
247	CP059867.1	98.67	2295754	2295680
248	CP059873.1	98.67	481151	481077
249	CP059872.1	100	1751943	1752017
250	CP059872.1	100	2448202	2448275
251	CP059870.1	98.67	1677733	1677807
252	CP059873.1	98.67	977968	977894
253	CP059870.1	98.67	4179508	4179582
254	CP059866.1	100	370158	370230
255	CP059870.1	100	2432612	2432686
256	CP059872.1	100	1475723	1475649
257	CP059866.1	98.67	3995028	3994954
258	CP059873.1	98.67	400067	399993
259	CP059868.1	98.67	1015526	1015452
260	CP059866.1	98.67	1085732	1085658
