# Supplementary material for: Metagenomic Next-Generation Sequencing in the Diagnosis of HHV-1 Reactivation in a Critically Ill COVID-19 Patient: A Case Report
Source: Front Med (Lausanne). 2021 Oct 4;8:715519. doi: 10.3389/fmed.2021.715519 (PMC8520926; doi:10.3389/fmed.2021.715519)
Supplement: Supplementary file 9 [file Table_9.XLSX]

## Sheet: Acinetobacter baumannii
Reads number	Reference	Identity	Start	End
1	CP015121.1	100	495987	496061
1	CP015121.1	100	528207	528281
1	CP015121.1	100	22880	22954
1	CP015121.1	100	3733161	3733087
1	CP015121.1	100	3283427	3283353
1	CP015121.1	100	3943544	3943470
2	CP015121.1	100	496020	495946
2	CP015121.1	100	3283394	3283468
2	CP015121.1	100	22913	22839
2	CP015121.1	100	528240	528166
2	CP015121.1	100	3943511	3943585
2	CP015121.1	100	3733128	3733202
3	CP015121.1	100	3944102	3944028
3	CP015121.1	100	3733719	3733645
3	CP015121.1	100	22322	22396
3	CP015121.1	100	527649	527723
3	CP015121.1	100	3283985	3283911
3	CP015121.1	100	495429	495503
4	CP015121.1	100	495994	495920
4	CP015121.1	100	528214	528140
4	CP015121.1	100	3733154	3733228
4	CP015121.1	100	22887	22813
4	CP015121.1	100	3283420	3283494
4	CP015121.1	100	3943537	3943611
5	CP015121.1	100	3061797	3061723
6	CP015121.1	100	3061797	3061723
7	CP015121.1	100	3283417	3283491
7	CP015121.1	100	3733151	3733225
7	CP015121.1	100	528217	528143
7	CP015121.1	100	495997	495923
7	CP015121.1	100	22890	22816
7	CP015121.1	100	3943534	3943608
8	CP015121.1	100	22908	22834
8	CP015121.1	100	3943516	3943590
8	CP015121.1	100	528235	528161
8	CP015121.1	100	3283399	3283473
8	CP015121.1	100	496015	495941
8	CP015121.1	100	3733133	3733207
9	CP015121.1	100	3733199	3733125
9	CP015121.1	100	528169	528243
9	CP015121.1	100	3943582	3943508
9	CP015121.1	100	3283465	3283391
9	CP015121.1	100	495949	496023
9	CP015121.1	100	22842	22916
10	CP015121.1	100	616508	616434
11	CP015121.1	100	3283420	3283494
11	CP015121.1	100	22887	22813
11	CP015121.1	100	528214	528140
11	CP015121.1	100	495994	495920
11	CP015121.1	100	3943537	3943611
11	CP015121.1	100	3733154	3733228
12	CP015121.1	100	3370427	3370501
13	CP015121.1	100	1248497	1248423
14	CP015121.1	100	616286	616360
15	CP015121.1	100	490352	490278
16	CP015121.1	100	2113449	2113523
17	CP015121.1	100	301611	301537
18	CP015121.1	100	159382	159308
19	CP015121.1	100	1247983	1248057
20	CP015121.1	100	861291	861217
21	CP015121.1	100	1480409	1480335
22	CP015121.1	100	490352	490278
23	CP015121.1	100	449772	449846
24	CP015121.1	100	444041	444115
25	CP015121.1	100	3181021	3180947
26	CP015121.1	100	616778	616852
27	CP015121.1	100	38760	38834
28	CP015121.1	100	2930399	2930325
29	CP015121.1	100	829334	829408
30	CP015121.1	100	3938018	3937944
31	CP015121.1	100	1062558	1062632
32	CP015121.1	100	3334026	3333952
33	CP015121.1	100	159182	159256
34	CP015121.1	100	1248497	1248423
35	CP015121.1	100	3724056	3723982
36	CP015121.1	100	2113449	2113523
37	CP015121.1	100	1248144	1248070
38	CP015121.1	100	3334026	3333952
39	CP015121.1	100	3624162	3624088
40	CP015121.1	100	3875546	3875620
41	CP015121.1	100	617110	617036
42	CP015121.1	100	1642559	1642485
43	CP015121.1	100	38627	38701
44	CP015121.1	100	1247233	1247307
45	CP015121.1	100	464735	464809
46	CP015121.1	100	2711336	2711410
47	CP015121.1	100	3401216	3401290
48	CP015121.1	100	2930172	2930246
49	CP015121.1	100	829449	829375
50	CP015121.1	100	590771	590697
51	CP015121.1	100	3456741	3456815
52	CP015121.1	100	1247233	1247307
53	CP015121.1	100	3128060	3127986
54	CP015121.1	100	3937887	3937961
55	CP015121.1	100	3209611	3209537
56	CP015121.1	100	3207742	3207816
57	CP015121.1	100	1613279	1613205
58	CP015121.1	100	742343	742417
59	CP015121.1	100	3080865	3080791
60	CP015121.1	100	3108296	3108370
61	CP015121.1	100	1168315	1168241
62	CP015121.1	100	872264	872190

## Sheet: Human alphaherpesvirus 1
Reads number	Reference	Identity	Start	End
1	LT576869.1	100	121667	121593
1	LT594192.1	100	129353	129279
1	LT594108.1	100	147215	147289
1	LT594108.1	100	129676	129602
1	LT594192.1	100	146796	146870
1	JN555585.1	100	147858	147932
1	JN555585.1	100	130339	130265
1	LT576867.1	100	122685	122611
1	LT576870.1	100	141524	141598
1	X14112.1	100	147897	147971
1	X14112.1	100	130336	130262
2	LT594108.1	100	102762	102836
2	LT576870.1	100	98738	98812
2	JN555585.1	100	103035	103109
2	LT594192.1	100	102591	102665
2	LT576869.1	100	101742	101816
2	X14112.1	100	103034	103108
2	LT608134.1	100	100056	100130
2	LT576868.1	100	97116	97190
2	LT576871.1	100	102608	102682
2	LT576867.1	100	102841	102915
3	LT594192.1	100	147054	146980
3	LT576869.1	100	121409	121483
3	LT576867.1	100	122427	122501
3	LT594192.1	100	129095	129169
3	LT594108.1	100	147473	147399
3	JN555585.1	100	148116	148042
3	LT594108.1	100	129418	129492
3	JN555585.1	100	130081	130155
3	X14112.1	100	130078	130152
3	X14112.1	100	148155	148081
3	LT576870.1	100	141782	141708
4	LT594108.1	100	100760	100834
4	LT594192.1	100	100589	100663
4	LT576867.1	100	100839	100913
4	LT576871.1	100	100606	100680
4	JN555585.1	100	101033	101107
4	X14112.1	100	101032	101106
4	LT608134.1	100	98054	98128
4	LT576869.1	100	99740	99814
4	LT576870.1	100	96736	96810
4	LT576868.1	100	95114	95188
5	LT594108.1	100	113489	113563
5	LT576869.1	100	112469	112543
5	JN555585.1	100	113758	113832
5	LT576871.1	100	113882	113956
5	LT576868.1	100	107839	107913
5	LT594192.1	100	113316	113390
5	LT608134.1	100	111454	111528
5	LT576870.1	100	109460	109534
5	X14112.1	100	113757	113831
6	LT576867.1	100	82059	81985
6	LT576871.1	100	81374	81300
6	JN555585.1	100	82259	82185
6	X14112.1	100	82259	82185
6	LT594108.1	100	81982	81908
6	LT576868.1	100	76352	76278
6	LT608134.1	100	78043	77969
6	LT594192.1	98.67	81826	81752
7	LT576867.1	100	32236	32310
7	LT576869.1	100	31244	31318
7	LT576871.1	100	30446	30520
7	LT576868.1	100	26758	26832
7	LT594192.1	100	32334	32408
7	LT594108.1	100	32363	32437
7	LT576870.1	100	28333	28407
7	LT608134.1	100	26705	26779
7	X14112.1	98.67	32557	32631
7	JN555585.1	98.67	32558	32632
8	LT576871.1	100	28493	28419
8	LT576867.1	100	30282	30208
8	LT576869.1	100	28656	28582
8	X14112.1	100	30604	30530
8	LT594192.1	100	30381	30307
8	LT576870.1	100	26381	26307
8	JN555585.1	100	30605	30531
8	LT608134.1	100	24752	24678
8	LT594108.1	100	30410	30336
8	LT576868.1	97.33	24805	24731
9	LT608134.1	100	46625	46699
9	LT594108.1	100	51265	51339
9	LT576870.1	100	47241	47315
9	X14112.1	100	51470	51544
9	JN555585.1	100	51471	51545
9	LT576871.1	100	49821	49895
9	LT576867.1	100	51129	51203
9	LT576869.1	100	50370	50444
9	LT594192.1	100	51235	51309
9	LT576868.1	100	45664	45738
10	LT608134.1	100	52836	52762
10	LT576871.1	100	56241	56167
10	LT576870.1	100	53080	53006
10	JN555585.1	100	57311	57237
10	X14112.1	100	57310	57236
10	LT594108.1	100	57105	57031
10	LT576868.1	100	51509	51435
10	LT594192.1	100	57087	57013
10	LT576867.1	100	56965	56891
10	LT576869.1	100	56211	56137
11	X14112.1	100	82137	82211
11	LT594108.1	100	81860	81934
11	LT608134.1	100	77921	77995
11	LT576871.1	100	81252	81326
11	JN555585.1	100	82137	82211
11	LT576868.1	100	76230	76304
11	LT576867.1	100	81937	82011
11	LT576870.1	98.67	77844	77918
11	LT594192.1	98.67	81704	81778
11	LT576869.1	98.67	80845	80919
12	LT594192.1	100	51011	51085
12	LT576867.1	98.67	50905	50979
13	LT576870.1	100	35371	35297
13	LT576869.1	100	38286	38212
13	LT594108.1	100	39402	39328
13	LT576871.1	100	37953	37879
13	X14112.1	100	39597	39523
13	LT594192.1	100	39374	39300
13	LT576868.1	100	33797	33723
13	JN555585.1	100	39598	39524
13	LT608134.1	100	34757	34683
13	LT576867.1	100	39265	39191
14	X14112.1	100	59634	59708
14	LT594192.1	100	59411	59485
14	LT594108.1	100	59429	59503
14	LT608134.1	100	55145	55219
14	LT576869.1	100	58520	58594
14	LT576871.1	100	58550	58624
14	JN555585.1	100	59635	59709
14	LT576868.1	100	53833	53907
14	LT576870.1	100	55388	55462
14	LT576867.1	100	59289	59362
15	X14112.1	100	30504	30578
15	LT594192.1	100	30281	30355
15	LT576867.1	100	30182	30256
15	JN555585.1	100	30505	30579
15	LT594108.1	100	30310	30384
15	LT576869.1	100	28556	28630
15	LT576870.1	100	26281	26355
15	LT576868.1	98.67	24705	24779
15	LT608134.1	98.67	24652	24726
15	LT576871.1	98.67	28393	28467
16	LT576867.1	100	51244	51170
16	LT576869.1	100	50485	50411
16	LT594108.1	100	51380	51306
16	LT594192.1	100	51350	51276
16	LT576870.1	100	47356	47282
16	X14112.1	100	51585	51511
16	LT576871.1	100	49936	49862
16	LT608134.1	100	46740	46666
16	JN555585.1	100	51586	51512
16	LT576868.1	98.67	45779	45705
17	LT594108.1	100	39303	39377
17	LT594192.1	100	39275	39349
17	LT608134.1	100	34658	34732
17	JN555585.1	100	39499	39573
17	LT576867.1	100	39166	39240
17	LT576871.1	100	37854	37928
17	LT576869.1	100	38187	38261
17	LT576870.1	100	35272	35346
17	LT576868.1	100	33698	33772
17	X14112.1	100	39498	39572
18	LT594108.1	100	66795	66869
18	X14112.1	100	66998	67072
18	LT576870.1	100	62756	62830
18	LT594192.1	100	66779	66853
18	LT576868.1	100	61051	61125
18	LT608134.1	100	62655	62729
18	LT576871.1	100	66031	66105
18	JN555585.1	100	66998	67072
18	LT576869.1	100	65683	65757
18	LT576867.1	98.67	66504	66578
19	LT594108.1	100	59693	59619
19	X14112.1	100	59898	59824
19	LT594192.1	100	59675	59601
19	LT576867.1	100	59553	59479
19	LT576868.1	100	54097	54023
19	JN555585.1	100	59899	59825
19	LT608134.1	98.67	55409	55335
19	LT576871.1	98.67	58814	58740
19	LT576870.1	98.67	55652	55578
19	LT576869.1	98.67	58784	58710
20	X14112.1	100	52664	52738
20	LT576870.1	100	48435	48509
20	LT594108.1	100	52459	52533
20	LT594192.1	100	52429	52503
20	LT576868.1	100	46858	46932
20	JN555585.1	100	52665	52739
20	LT576869.1	100	51564	51638
20	LT576871.1	100	51015	51089
20	LT608134.1	100	47819	47893
20	LT576867.1	100	52323	52397
21	LT576871.1	100	100748	100674
21	LT594108.1	100	100902	100828
21	LT608134.1	100	98196	98122
21	LT576869.1	100	99882	99808
21	X14112.1	100	101174	101100
21	LT576870.1	100	96878	96804
21	LT594192.1	100	100731	100657
21	JN555585.1	100	101175	101101
21	LT576867.1	100	100981	100907
22	LT576870.1	100	62658	62584
22	LT594192.1	100	66681	66607
22	JN555585.1	98.67	66900	66826
22	X14112.1	98.67	66900	66826
22	LT608134.1	98.67	62557	62483
22	LT576868.1	98.67	60953	60879
22	LT576867.1	98.67	66406	66332
22	LT576869.1	100	65585	65512
22	LT594108.1	98.67	66697	66623
22	LT576871.1	98.67	65933	65859
23	LT576869.1	100	9663	9589
23	LT608134.1	100	4605	4531
23	LT576871.1	100	6619	6545
23	LT576868.1	100	5820	5746
23	JN555585.1	100	11616	11542
23	LT576867.1	100	11286	11212
23	X14112.1	100	11615	11541
23	LT576870.1	100	7393	7319
23	LT594192.1	100	11395	11321
23	LT594108.1	100	11417	11343
24	LT576871.1	100	114034	113960
24	LT594192.1	100	113468	113394
24	JN555585.1	100	113910	113836
24	LT608134.1	100	111606	111532
24	LT594108.1	100	113641	113567
24	LT576870.1	100	109612	109538
24	LT576869.1	100	112621	112547
24	X14112.1	100	113909	113835
25	X14112.1	100	103215	103141
25	LT594108.1	100	102943	102869
25	LT594192.1	100	102772	102698
25	LT608134.1	100	100237	100163
25	LT576868.1	100	97297	97223
25	LT576871.1	100	102789	102715
25	LT576870.1	100	98919	98845
25	JN555585.1	100	103216	103142
26	JN555585.1	100	67086	67012
26	LT576869.1	100	65771	65697
26	LT608134.1	100	62743	62669
26	LT576867.1	100	66592	66518
26	LT576871.1	100	66119	66045
26	LT594192.1	100	66867	66793
26	LT594108.1	100	66883	66809
26	LT576870.1	100	62844	62770
26	X14112.1	100	67086	67012
26	LT576868.1	100	61139	61065
27	LT576871.1	100	60376	60450
27	LT594108.1	100	61255	61329
27	LT608134.1	100	56971	57045
27	LT576868.1	100	55659	55733
27	X14112.1	98.67	61460	61534
27	LT576867.1	98.67	61115	61189
27	JN555585.1	98.67	61461	61535
28	LT576867.1	100	51238	51164
28	LT576870.1	100	47350	47276
28	JN555585.1	100	51580	51506
28	LT594192.1	100	51344	51270
28	X14112.1	100	51579	51505
28	LT576869.1	100	50479	50405
28	LT576871.1	100	49930	49856
28	LT594108.1	100	51374	51300
28	LT608134.1	100	46734	46660
28	LT576868.1	98.67	45773	45699
29	LT576869.1	100	56069	56143
29	LT576867.1	100	56823	56897
29	LT594108.1	100	56963	57037
29	X14112.1	100	57168	57242
29	LT576868.1	100	51367	51441
29	LT576870.1	100	52938	53012
29	LT594192.1	100	56945	57019
29	JN555585.1	100	57169	57243
29	LT608134.1	100	52694	52768
29	LT576871.1	100	56099	56173
30	LT576870.1	100	62538	62612
30	LT594192.1	100	66561	66635
30	LT576871.1	98.67	65813	65887
30	LT608134.1	98.67	62437	62511
30	LT576868.1	98.67	60833	60907
30	LT576867.1	98.67	66286	66360
30	X14112.1	98.67	66780	66854
30	LT594108.1	98.67	66577	66651
30	JN555585.1	98.67	66780	66854
31	LT576871.1	100	4796	4870
31	LT576871.1	100	4165	4239
31	LT576867.1	100	10073	10147
31	X14112.1	100	10402	10476
31	LT594108.1	100	10204	10278
31	LT576868.1	100	4607	4681
31	LT576869.1	100	8450	8524
31	JN555585.1	100	10403	10477
31	LT608134.1	100	2639	2713
31	LT576870.1	100	6180	6254
31	LT594192.1	98.67	10182	10256
32	LT576867.1	100	95952	95878
32	JN555585.1	100	96153	96079
32	LT594108.1	100	95881	95807
32	X14112.1	100	96153	96079
32	LT576868.1	100	90239	90165
32	LT608134.1	100	93179	93105
32	LT576869.1	100	94860	94786
32	LT576870.1	100	91857	91783
32	LT576871.1	100	95731	95657
32	LT594192.1	100	95713	95639
33	X14112.1	100	112384	112310
33	LT608134.1	100	109850	109776
33	JN555585.1	100	112385	112311
33	LT576869.1	100	111096	111022
33	LT576868.1	100	106469	106395
33	LT576867.1	100	112198	112124
33	LT576870.1	100	108087	108013
33	LT594192.1	100	111943	111869
33	LT594108.1	100	112116	112042
33	LT576871.1	100	112509	112435
34	LT576868.1	100	130291	130365
34	JN555585.1	100	143361	143435
34	LT576869.1	100	134614	134688
34	LT608134.1	100	137132	137206
34	LT576870.1	100	137459	137533
34	LT594192.1	100	142344	142418
34	X14112.1	100	143357	143431
34	LT594108.1	100	142746	142820
34	LT576871.1	100	137461	137535
35	LT594108.1	100	103716	103790
35	LT594192.1	98.67	103543	103617
35	JN555585.1	98.67	103987	104061
35	LT608134.1	98.67	101008	101082
35	X14112.1	98.67	103986	104060
35	LT576867.1	98.67	103798	103872
35	LT576868.1	98.67	98068	98142
35	LT576871.1	98.67	103560	103634
36	LT594192.1	100	22034	21960
36	X14112.1	100	22253	22179
36	LT576868.1	100	16459	16385
36	LT576869.1	100	20301	20227
36	LT576871.1	100	18377	18303
36	LT608134.1	100	16401	16327
36	LT576870.1	100	18030	17956
36	LT576867.1	100	21927	21853
36	JN555585.1	100	22254	22180
36	LT594108.1	100	22055	21981
37	LT594108.1	100	142866	142792
37	LT594192.1	100	142464	142390
37	LT576867.1	100	135853	135779
37	LT576871.1	100	137581	137507
37	LT608134.1	100	137252	137178
37	JN555585.1	100	143481	143407
37	LT576868.1	100	130411	130337
37	X14112.1	100	143477	143403
37	LT576869.1	100	134734	134660
37	LT576870.1	100	137579	137505
38	LT594108.1	100	124183	124257
38	LT576869.1	100	116481	116555
38	X14112.1	100	1830	1756
38	LT576870.1	100	119632	119706
38	LT576868.1	100	752	678
38	JN555585.1	100	124543	124617
38	LT576867.1	100	1539	1465
38	LT594192.1	100	1787	1713
38	LT608134.1	100	151	77
38	X14112.1	100	124541	124615
38	LT576871.1	100	123366	123440
38	JN555585.1	100	1831	1757
38	LT594108.1	100	1716	1642
38	LT594192.1	100	123940	124014
39	LT576871.1	100	5835	5909
39	LT594108.1	100	11243	11317
39	LT608134.1	100	4431	4505
39	X14112.1	100	11441	11515
39	LT576871.1	100	6445	6519
39	LT576868.1	100	5646	5720
39	JN555585.1	100	11442	11516
39	LT576867.1	100	11112	11186
40	LT576869.1	98.67	60780	60706
40	LT576870.1	98.67	57648	57574
40	LT576871.1	98.67	60810	60736
40	JN555585.1	98.67	61895	61821
40	LT594192.1	98.67	61671	61597
40	X14112.1	98.67	61894	61820
40	LT594108.1	98.67	61689	61615
40	LT576867.1	98.67	61549	61475
40	LT576868.1	98.67	56093	56019
40	LT608134.1	98.67	57405	57331
41	LT594108.1	100	104173	104099
41	LT576871.1	100	104017	103943
41	LT576869.1	100	103153	103079
41	LT594192.1	100	104000	103926
41	LT608134.1	100	101465	101391
41	LT576868.1	100	98525	98451
41	LT576870.1	100	100147	100073
42	X14112.1	100	22115	22189
42	LT594108.1	100	21917	21991
42	LT576870.1	100	17892	17966
42	LT608134.1	100	16263	16337
42	LT576871.1	100	18239	18313
42	JN555585.1	100	22116	22190
42	LT576869.1	100	20163	20237
42	LT576867.1	100	21789	21863
42	LT576868.1	100	16321	16395
42	LT594192.1	100	21896	21970
43	LT594108.1	100	111984	112057
43	LT576869.1	100	110964	111037
43	JN555585.1	100	112253	112326
43	X14112.1	100	112252	112325
43	LT576870.1	100	107955	108028
43	LT608134.1	100	109718	109791
43	LT576868.1	100	106337	106410
43	LT576871.1	100	112377	112450
43	LT594192.1	100	111811	111884
43	LT576867.1	100	112066	112139
44	LT576869.1	98.67	116606	116532
44	X14112.1	98.67	1705	1779
44	LT594108.1	98.67	124308	124234
44	LT576871.1	98.67	123491	123417
44	JN555585.1	98.67	124668	124594
44	LT608134.1	98.67	122605	122531
44	LT576870.1	98.67	120412	120338
44	LT576870.1	98.67	119757	119683
44	LT576868.1	98.67	627	701
44	JN555585.1	98.67	1706	1780
44	LT594192.1	98.67	1662	1736
44	LT576867.1	98.67	1414	1488
44	LT594108.1	98.67	1591	1665
44	LT594192.1	98.67	124065	123991
44	X14112.1	98.67	124666	124592
44	LT608134.1	98.67	26	100
45	LT594192.1	98.67	32502	32428
45	LT608134.1	98.67	26873	26799
45	LT576870.1	98.67	28501	28427
45	LT576871.1	98.67	30614	30540
45	LT576869.1	98.67	31412	31338
45	LT576868.1	98.67	26926	26852
45	LT576867.1	98.67	32404	32330
45	LT594108.1	98.67	32531	32457
46	LT594108.1	98.67	10315	10241
