# Supplementary material for: Metagenomic Next-Generation Sequencing in the Diagnosis of HHV-1 Reactivation in a Critically Ill COVID-19 Patient: A Case Report
Source: Front Med (Lausanne). 2021 Oct 4;8:715519. doi: 10.3389/fmed.2021.715519 (PMC8520926; doi:10.3389/fmed.2021.715519)
Supplement: Supplementary file 14 [file Table_14.XLSX]

## Sheet: Mycobacteroides abscessus
Reads number	Reference	Identity	Start	End
1	CP014951.1	100	126423	126497
1	AP014547.1	100	123884	123958
1	CP014952.1	100	118489	118563
1	CP012044.1	100	166192	166266
1	CP003699.2	100	4561338	4561264
1	CP014953.1	100	126595	126669
1	CP013049.1	100	107078	107152
1	CU458896.1	100	121456	121530
1	CP004374.1	98.67	126589	126663
1	CP014950.1	97.33	131105	131179
2	CP013049.1	100	4129330	4129256
2	CP012044.1	100	4419786	4419712
2	CP014952.1	100	4017876	4017802
2	CU458896.1	100	4124283	4124209
2	CP014950.1	98.67	3935513	3935439
2	CP014951.1	97.33	4399978	4399904
2	CP004374.1	97.33	4086998	4086924
2	AP014547.1	97.33	4141272	4141198
2	CP014953.1	97.33	4223110	4223036
2	CP003699.2	97.33	825827	825901
3	CP014952.1	100	2695905	2695831
3	CP013049.1	100	2616457	2616383
3	CU458896.1	100	2807987	2807913
3	AP014547.1	100	2738682	2738608
3	CP014950.1	100	2622705	2622631
3	CP012044.1	100	2810189	2810115
4	CP014953.1	100	65203	65129
4	CP004374.1	100	65197	65123
4	CP012044.1	100	98157	98083
4	CP014951.1	100	65203	65129
4	CU458896.1	100	59578	59504
4	CP014952.1	100	57099	57025
4	AP014547.1	100	62491	62417
4	CP013049.1	100	45198	45124
4	CP003699.2	100	4622731	4622805
4	CP014950.1	100	63179	63105
5	CP012044.1	100	1522956	1522882
5	CP013049.1	98.67	1264607	1264533
5	CP004374.1	98.67	1419347	1419273
5	CP014952.1	98.67	1329865	1329791
5	AP014547.1	98.67	1401877	1401803
5	CU458896.1	98.67	1396142	1396068
6	CP013049.1	100	2957380	2957454
6	CP012044.1	100	3421644	3421718
6	CU458896.1	100	3149870	3149944
6	CP014952.1	98.67	3043317	3043391
6	CP014953.1	98.67	3245481	3245555
6	CP004374.1	98.67	3085082	3085156
6	CP014951.1	98.67	3380449	3380523
6	CP014950.1	98.67	2962929	2963003
6	CP003699.2	98.67	1791493	1791419
6	AP014547.1	97.33	3117748	3117822
7	CU458896.1	100	4847148	4847074
7	CP014951.1	100	5097738	5097664
7	CP014953.1	100	4919845	4919771
7	CP012044.1	100	5120107	5120033
7	AP014547.1	100	4825584	4825510
7	CP014952.1	100	4696423	4696349
7	CP004374.1	100	4820716	4820642
7	CP003699.2	100	144694	144768
7	CP013049.1	100	4853929	4853855
8	CU458896.1	100	4863631	4863557
8	CP013049.1	100	4870412	4870338
8	CP014950.1	98.67	4687185	4687111
8	CP014951.1	98.67	5114195	5114121
8	AP014547.1	98.67	4842036	4841962
8	CP014953.1	98.67	4936302	4936228
8	CP003699.2	98.67	128237	128311
8	CP004374.1	98.67	4837173	4837099
8	CP014952.1	98.67	4712919	4712845
8	CP012044.1	98.67	5136589	5136515
9	CU458896.1	100	206209	206283
9	CP013049.1	100	191459	191533
9	CP012044.1	100	250947	251021
9	CP014953.1	98.67	211367	211441
9	CP014951.1	98.67	211195	211269
9	AP014547.1	98.67	206026	206100
9	CP014952.1	98.67	200658	200732
9	CP003699.2	98.67	4476567	4476493
9	CP014950.1	98.67	215843	215917
9	CP004374.1	98.67	208961	209035
10	CP012044.1	100	43352	43278
11	CP013049.1	100	114845	114919
11	CP012044.1	100	173959	174033
11	CU458896.1	100	129223	129297
11	CP004374.1	98.67	134361	134435
11	AP014547.1	98.67	131656	131730
11	CP014951.1	98.67	134195	134269
11	CP014953.1	98.67	134367	134441
11	CP003699.2	98.67	4553566	4553492
11	CP014952.1	97.33	126261	126335
12	CP014950.1	100	1603394	1603468
12	CP013049.1	100	1583058	1583132
12	CU458896.1	100	1714969	1715043
12	CP012044.1	98.67	1849788	1849862
13	CP012044.1	100	2468965	2469039
13	CP013049.1	100	2275526	2275600
13	CU458896.1	100	2475784	2475858
13	CP014950.1	98.67	2287917	2287991
14	CP013049.1	100	1472456	1472530
14	CU458896.1	100	1604169	1604243
14	CP012044.1	100	1739024	1739098
14	CP014952.1	98.67	1538221	1538295
14	AP014547.1	98.67	1611091	1611165
14	CP014951.1	97.33	1619129	1619203
14	CP014950.1	97.33	1492884	1492958
14	CP014953.1	97.33	1540664	1540738
14	CP004374.1	97.33	1696661	1696735
14	CP003699.2	97.33	3199957	3199883
15	CP013049.1	100	3575703	3575777
15	CU458896.1	100	3712286	3712360
15	CP012044.1	100	3955254	3955328
16	CU458896.1	100	1614117	1614043
16	CP013049.1	100	1482404	1482330
16	CP012044.1	100	1748972	1748898
17	CP013049.1	100	4045797	4045723
17	CU458896.1	100	4039830	4039756
17	CP012044.1	100	4335309	4335235
17	CP004374.1	98.67	4003539	4003465
17	CP014952.1	98.67	3933460	3933386
17	AP014547.1	98.67	4056976	4056902
18	CP013049.1	100	3643309	3643383
18	CU458896.1	100	3779930	3780004
18	CP014950.1	98.67	3588098	3588172
19	CP013049.1	100	2227425	2227499
19	CU458896.1	100	2427691	2427765
20	CU458896.1	100	4124165	4124239
20	CP013049.1	100	4129212	4129286
20	CP012044.1	100	4419668	4419742
20	CP014952.1	98.67	4017758	4017832
21	CU458896.1	100	2460073	2459999
21	CP013049.1	100	2259815	2259741
21	CP012044.1	98.67	2453254	2453180
21	CP014950.1	98.67	2272203	2272129
21	AP014547.1	98.67	2367213	2367139
21	CP014952.1	98.67	2293546	2293472
22	CU458896.1	100	59455	59529
22	CP013049.1	100	45075	45149
22	CP012044.1	100	98034	98108
22	CP014950.1	100	63056	63130
22	CP014953.1	98.67	65080	65154
22	CP014952.1	98.67	56976	57050
22	CP003699.2	98.67	4622854	4622780
22	AP014547.1	98.67	62368	62442
22	CP014951.1	98.67	65080	65154
22	CP004374.1	98.67	65074	65148
23	CP003699.2	100	1862443	1862369
23	CP014952.1	100	2972381	2972455
23	CP012044.1	100	3348741	3348815
23	CP014950.1	100	2892919	2892993
23	CU458896.1	100	3078842	3078916
23	CP013049.1	100	2886358	2886432
23	AP014547.1	100	3046799	3046873
23	CP014953.1	100	3174530	3174604
23	CP004374.1	100	3014134	3014208
23	CP014951.1	100	3309498	3309572
24	CP013049.1	100	616839	616765
24	CP012044.1	100	726952	726878
24	CU458896.1	100	636073	635999
24	CP014953.1	98.67	669163	669089
24	CP003699.2	98.67	4070201	4070275
24	CP014951.1	98.67	747756	747682
24	CP004374.1	98.67	651326	651252
24	CP014952.1	98.67	569215	569141
24	AP014547.1	97.33	624744	624670
25	CU458896.1	100	1715071	1714997
25	CP014952.1	100	1648616	1648542
25	CP003699.2	100	3090362	3090436
25	CP014953.1	100	1650260	1650186
25	CP012044.1	100	1849890	1849816
25	CP014950.1	100	1603496	1603422
25	AP014547.1	100	1720658	1720584
25	CP004374.1	100	1806276	1806202
25	CP014951.1	100	1728725	1728651
25	CP013049.1	100	1583160	1583086
26	CU458896.1	100	3503476	3503402
26	CP012044.1	100	3773545	3773471
26	CP013049.1	100	3310806	3310732
26	CP014952.1	98.67	3397772	3397698
27	CP003699.2	100	1504284	1504210
27	AP014547.1	100	3379419	3379493
27	CP004374.1	100	3352323	3352397
27	CP014950.1	100	3238459	3238533
27	CP014953.1	100	3532771	3532845
27	CP014952.1	100	3311555	3311629
27	CP014951.1	100	3667739	3667813
27	CU458896.1	100	3420748	3420822
27	CP012044.1	100	3692482	3692556
27	CP013049.1	100	3228189	3228263
28	CP013049.1	100	3576045	3575971
28	CU458896.1	100	3712628	3712554
28	CP012044.1	100	3955596	3955522
29	CP012044.1	100	2359019	2359093
29	CP014950.1	98.67	2187729	2187803
29	CP014951.1	98.67	2343190	2343264
29	CP014953.1	98.67	2209919	2209993
29	CP004374.1	98.67	2299855	2299929
29	CP003699.2	98.67	2591080	2591006
29	AP014547.1	98.67	2282715	2282789
29	CP014952.1	98.67	2209020	2209094
29	CU458896.1	98.67	2365088	2365162
29	CP013049.1	98.67	2165193	2165267
30	CP014953.1	100	4139516	4139590
30	AP014547.1	100	4056832	4056906
30	CP003699.2	100	909422	909348
30	CP014952.1	100	3933316	3933390
30	CP012044.1	100	4335165	4335239
30	CP014951.1	100	4316384	4316458
30	CP004374.1	100	4003395	4003469
30	CP013049.1	100	4045653	4045727
30	CU458896.1	100	4039686	4039760
30	CP014950.1	98.67	3851106	3851180
31	CP013049.1	100	2227563	2227489
31	CU458896.1	100	2427829	2427755
31	CP014951.1	98.67	2405380	2405306
31	CP012044.1	98.67	2421759	2421685
31	CP014950.1	98.67	2250170	2250096
31	CP003699.2	98.67	2529075	2529149
31	AP014547.1	98.67	2345192	2345118
31	CP014953.1	98.67	2272109	2272035
32	CP014950.1	100	1503189	1503115
32	CP013049.1	100	1482762	1482688
32	CP012044.1	100	1749330	1749256
32	CU458896.1	100	1614475	1614401
32	CP014952.1	100	1548535	1548461
32	AP014547.1	100	1621404	1621330
32	CP014953.1	100	1550978	1550904
32	CP014951.1	100	1629443	1629369
32	CP004374.1	100	1706975	1706901
32	CP003699.2	100	3189643	3189717
33	CP013049.1	100	948794	948720
33	CP012044.1	100	1220697	1220623
33	CU458896.1	100	1080076	1080002
34	CP013049.1	100	3502815	3502741
34	CU458896.1	100	3639252	3639178
34	CP014951.1	98.67	3862438	3862364
34	CP012044.1	98.67	3882235	3882161
34	CP014953.1	98.67	3727470	3727396
34	CP004374.1	98.67	3605379	3605305
34	CP003699.2	98.67	1309608	1309682
34	CP014952.1	98.67	3504669	3504595
34	AP014547.1	98.67	3588046	3587972
35	CP013049.1	100	3470929	3470855
35	CU458896.1	100	3607269	3607195
36	AP014547.1	100	3046937	3046863
36	CP013049.1	100	2886496	2886422
36	CU458896.1	100	3078980	3078906
36	CP012044.1	100	3348879	3348805
36	CP014952.1	100	2972519	2972445
36	CP003699.2	100	1862305	1862379
36	CP014951.1	100	3309636	3309562
36	CP014953.1	100	3174668	3174594
36	CP014950.1	100	2893057	2892983
36	CP004374.1	100	3014272	3014198
37	CP003699.2	100	80517	80443
37	CP014951.1	100	5161915	5161989
37	AP014547.1	100	4888575	4888649
37	CP004374.1	100	4921298	4921372
37	CP014953.1	100	4984022	4984096
37	CP014952.1	100	4759490	4759564
38	CU458896.1	100	307137	307211
38	CP012044.1	100	336553	336627
38	CP013049.1	100	275202	275276
38	CP014950.1	100	302725	302799
39	CP012044.1	100	376789	376863
39	CU458896.1	100	347358	347432
39	CP013049.1	100	315424	315498
40	CP013049.1	100	4267304	4267230
40	CP003699.2	100	687316	687390
40	AP014547.1	100	4278228	4278154
40	CP014950.1	100	4072805	4072731
40	CP014952.1	100	4156434	4156360
40	CP014951.1	100	4538455	4538381
40	CP012044.1	100	4576194	4576120
40	CU458896.1	100	4262814	4262740
40	CP004374.1	100	4245764	4245690
40	CP014953.1	100	4360561	4360487
41	CU458896.1	100	5060894	5060968
41	CP014952.1	100	4863020	4863094
41	CP003699.2	100	6338	6264
41	CP014951.1	100	5236094	5236168
41	CP012044.1	100	5250858	5250932
41	AP014547.1	100	4972107	4972181
41	CP004374.1	100	4994196	4994270
41	CP014953.1	100	5058201	5058275
41	CP013049.1	100	5067182	5067256
41	CP014950.1	98.67	4819767	4819841
42	CP014953.1	100	3196780	3196706
42	CP014952.1	100	2994631	2994557
42	CP014951.1	100	3331748	3331674
42	CP003699.2	100	1840193	1840267
42	CP012044.1	100	3372891	3372817
42	CU458896.1	98.67	3101088	3101014
42	AP014547.1	98.67	3069048	3068974
42	CP013049.1	98.67	2908599	2908525
42	CP004374.1	98.67	3036383	3036309
43	CP003699.2	100	58720	58794
43	CP012044.1	100	5198506	5198432
43	CP014951.1	100	5183712	5183638
43	CU458896.1	100	5008543	5008469
43	CP014950.1	100	4767383	4767309
43	CP013049.1	100	5014831	5014757
43	CP014953.1	100	5005819	5005745
44	CP014952.1	100	4510729	4510803
44	CU458896.1	100	4660397	4660471
44	CP013049.1	100	4668536	4668610
44	CP014953.1	98.67	4732700	4732774
44	CP014951.1	98.67	4910593	4910667
44	CP003699.2	98.67	331838	331764
45	CP012044.1	100	4498134	4498060
45	CP014952.1	100	4096426	4096352
45	CP014951.1	100	4478412	4478338
45	CP013049.1	100	4207682	4207608
45	CP014953.1	100	4300518	4300444
45	CP003699.2	100	747391	747465
45	CU458896.1	100	4202818	4202744
46	CP012044.1	100	4795233	4795159
46	CU458896.1	100	4526775	4526701
46	CP013049.1	100	4530408	4530334
46	CP014952.1	100	4384202	4384128
46	CP014950.1	100	4336269	4336195
47	CP014952.1	100	3913460	3913386
47	AP014547.1	100	4037004	4036930
47	CP012044.1	100	4315627	4315553
47	CP014953.1	100	4119693	4119619
47	CP004374.1	100	3984232	3984158
47	CP014951.1	100	4296561	4296487
47	CP003699.2	100	929245	929319
47	CP014950.1	98.67	3830953	3830879
47	CP013049.1	98.67	4025546	4025472
47	CU458896.1	98.67	4019564	4019490
48	CU458896.1	100	1926406	1926332
48	CP012044.1	100	1980352	1980278
48	CP014953.1	100	1853439	1853365
48	CP003699.2	100	2947561	2947635
48	CP014952.1	100	1791473	1791399
48	CP004374.1	100	1942850	1942776
48	CP014951.1	100	1931902	1931828
48	CP013049.1	100	1732651	1732577
48	AP014547.1	98.67	1925781	1925707
49	CU458896.1	100	1964763	1964837
49	CP012044.1	100	2018705	2018779
49	CP004374.1	100	1981194	1981268
49	CP013049.1	100	1770615	1770689
49	CP014950.1	98.67	1853838	1853912
49	CP014953.1	98.67	1894551	1894625
49	CP003699.2	98.67	2906449	2906375
49	CP014951.1	98.67	1973014	1973088
49	CP014952.1	98.67	1832592	1832666
49	AP014547.1	98.67	1966933	1967007
50	CP013049.1	100	1100761	1100687
50	CP012044.1	100	1361777	1361703
50	CU458896.1	100	1232168	1232094
51	CP014950.1	100	1837688	1837614
51	CP013049.1	100	1754860	1754786
51	CP004374.1	100	1965035	1964961
51	CU458896.1	100	1948616	1948542
51	CP012044.1	100	2002555	2002481
51	AP014547.1	100	1950777	1950703
51	CP014952.1	100	1816454	1816380
52	CP012044.1	100	4153292	4153218
52	CP013049.1	100	3907774	3907700
52	CU458896.1	100	3913123	3913049
52	CP014952.1	100	3779592	3779518
52	CP014953.1	100	4014379	4014305
52	CP014951.1	100	4149347	4149273
52	CP004374.1	100	3878902	3878828
52	AP014547.1	100	3882091	3882017
52	CP003699.2	100	1034559	1034633
52	CP014950.1	98.67	3724504	3724430
53	CP003699.2	100	3689516	3689442
53	CP004374.1	100	1104242	1104316
53	CP013049.1	100	949348	949422
53	CP014952.1	100	1042610	1042684
53	CP014951.1	100	1128428	1128502
53	CU458896.1	100	1080630	1080704
53	CP014953.1	100	1049835	1049909
53	CP012044.1	98.67	1221251	1221325
54	CP012044.1	100	2676261	2676187
55	CP013049.1	100	2563105	2563031
55	CP012044.1	100	2756770	2756696
55	CU458896.1	100	2754550	2754476
55	CP014951.1	98.67	2722992	2722918
55	CP003699.2	98.67	2211463	2211537
55	CP004374.1	98.67	2702791	2702717
55	CP014952.1	98.67	2629473	2629399
55	AP014547.1	98.67	2685300	2685226
55	CP014953.1	98.67	2589721	2589647
56	CU458896.1	100	3975406	3975332
56	CP012044.1	100	4220564	4220490
56	CP013049.1	100	3981468	3981394
57	CU458896.1	100	3639130	3639204
57	CP013049.1	100	3502693	3502767
57	CP012044.1	100	3882113	3882187
58	CP013049.1	100	4314917	4314843
58	CU458896.1	100	4310621	4310547
58	CP014950.1	100	4122820	4122746
58	CP012044.1	100	4624011	4623937
58	CP004374.1	98.67	4293503	4293429
58	AP014547.1	98.67	4325966	4325892
59	CP012044.1	100	187383	187457
59	CU458896.1	100	142646	142720
59	CP014951.1	100	147619	147693
59	CP014953.1	100	147791	147865
59	CP013049.1	100	128047	128121
59	CP003699.2	100	4540142	4540068
59	CP014952.1	98.67	137108	137182
59	CP004374.1	98.67	145402	145476
59	AP014547.1	98.67	142501	142575
60	CP012044.1	100	3335642	3335568
60	CP014950.1	100	2879820	2879746
60	CU458896.1	98.67	3065745	3065671
60	CP013049.1	98.67	2873261	2873187
61	CP014953.1	100	126791	126717
61	CP004374.1	100	126785	126711
61	CP003699.2	100	4561142	4561216
61	CP014951.1	100	126619	126545
61	CP013049.1	100	107274	107200
61	CP012044.1	100	166388	166314
61	CU458896.1	100	121652	121578
61	AP014547.1	100	124080	124006
61	CP014952.1	100	118685	118611
62	CP012044.1	100	1522823	1522897
63	CU458896.1	100	1302717	1302643
63	CP013049.1	100	1171310	1171236
63	CP012044.1	100	1432588	1432514
64	CU458896.1	100	4021629	4021555
64	CP013049.1	100	4027610	4027536
64	CP014952.1	100	3915525	3915451
64	CP012044.1	100	4317692	4317618
64	CP014950.1	100	3833018	3832944
65	CP012044.1	100	336637	336563
65	CU458896.1	100	307221	307147
65	CP013049.1	100	275286	275212
65	CP014950.1	100	302809	302735
66	CU458896.1	100	4262645	4262719
66	CP014950.1	100	4072636	4072710
66	CP003699.2	100	687485	687411
66	CP013049.1	100	4267135	4267209
66	CP004374.1	100	4245595	4245669
66	CP014952.1	100	4156265	4156339
66	CP012044.1	100	4576025	4576099
66	CP014953.1	100	4360392	4360466
66	CP014951.1	100	4538286	4538360
66	AP014547.1	100	4278059	4278133
67	CP013049.1	100	4730131	4730057
67	CU458896.1	100	4722213	4722139
67	CP012044.1	100	4995176	4995102
67	AP014547.1	98.67	4699203	4699129
67	CP003699.2	98.67	269731	269805
67	CP004374.1	98.67	4686568	4686494
67	CP014953.1	98.67	4794808	4794734
67	CP014951.1	98.67	4972701	4972627
67	CP014952.1	98.67	4572857	4572783
68	CP013049.1	100	5014701	5014775
68	CU458896.1	100	5008413	5008487
68	CP012044.1	100	5198376	5198450
69	CP012044.1	100	2722859	2722785
70	CP013049.1	100	191725	191651
70	CP012044.1	100	251213	251139
70	CU458896.1	100	206475	206401
70	CP014950.1	100	216109	216035
71	CU458896.1	100	4660584	4660510
71	CP014952.1	100	4510916	4510842
71	CP013049.1	100	4668723	4668649
71	CP014951.1	98.67	4910780	4910706
71	CP014950.1	98.67	4464728	4464654
71	CP014953.1	98.67	4732887	4732813
71	AP014547.1	98.67	4637267	4637193
71	CP012044.1	98.67	4933289	4933215
71	CP004374.1	98.67	4624631	4624557
71	CP003699.2	98.67	331651	331725
72	CP012044.1	100	2473404	2473478
72	CU458896.1	100	2480232	2480306
72	CP013049.1	100	2279974	2280048
73	CP012044.1	100	43138	43212
74	CP014951.1	100	4478089	4478163
74	CP014953.1	100	4300195	4300269
74	CU458896.1	100	4202495	4202569
74	CP012044.1	100	4497811	4497885
74	CP014952.1	100	4096103	4096177
74	CP013049.1	100	4207359	4207433
74	CP003699.2	100	747714	747640
74	AP014547.1	98.67	4217984	4218058
74	CP004374.1	98.67	4135454	4135528
75	CP013049.1	100	4025408	4025482
75	CU458896.1	100	4019426	4019500
75	CP012044.1	100	4315489	4315563
75	CP014952.1	100	3913322	3913396
76	CP012044.1	100	5154506	5154432
76	CP014952.1	100	4729933	4729859
76	CP013049.1	100	4888339	4888265
76	AP014547.1	100	4859050	4858976
76	CU458896.1	100	4881548	4881474
76	CP014951.1	100	5131154	5131080
76	CP003699.2	100	111278	111352
76	CP014953.1	100	4953261	4953187
76	CP004374.1	100	4886750	4886676
76	CP014950.1	100	4704199	4704125
77	CP012044.1	100	5088877	5088803
77	CP013049.1	100	4822726	4822652
77	CU458896.1	100	4815912	4815838
78	CP012044.1	100	1886521	1886595
78	CU458896.1	100	1751700	1751774
78	CP013049.1	100	1619789	1619863
79	CP014951.1	100	2714116	2714042
79	CP014952.1	100	2620597	2620523
79	CP003699.2	100	2220339	2220413
79	CP012044.1	100	2747894	2747820
79	CP004374.1	100	2693915	2693841
79	AP014547.1	100	2676424	2676350
79	CP014953.1	100	2580845	2580771
79	CU458896.1	100	2745674	2745600
79	CP013049.1	100	2554229	2554155
80	CP012044.1	100	1361653	1361727
80	CU458896.1	98.67	1232044	1232118
80	CP013049.1	98.67	1100637	1100711
81	CU458896.1	100	3607879	3607805
81	CP013049.1	100	3471539	3471465
82	CP012044.1	100	107645	107719
83	CP014952.1	100	4365738	4365664
83	CU458896.1	100	4508310	4508236
83	CP013049.1	100	4511976	4511902
84	CP014952.1	100	956239	956313
84	CU458896.1	100	1012926	1013000
84	CP013049.1	100	881722	881796
84	CP012044.1	100	1066455	1066529
84	CP003699.2	98.67	3756966	3756892
84	CP014951.1	98.67	1060977	1061051
84	CP014953.1	98.67	982384	982458
84	AP014547.1	98.67	928277	928351
84	CP004374.1	98.67	1026459	1026533
85	CP013049.1	100	2275771	2275697
85	CU458896.1	100	2476029	2475955
85	CP012044.1	98.67	2469210	2469136
86	CU458896.1	100	518165	518091
86	CP013049.1	100	499042	498968
86	CP012044.1	100	609044	608970
86	CP014950.1	98.67	477897	477823
87	CP003699.2	100	3199853	3199927
87	CP014950.1	100	1492988	1492914
87	CP013049.1	100	1472560	1472486
87	AP014547.1	100	1611195	1611121
87	CP012044.1	100	1739128	1739054
87	CP004374.1	100	1696765	1696691
87	CP014951.1	100	1619233	1619159
87	CP014953.1	100	1540768	1540694
87	CP014952.1	100	1538325	1538251
87	CU458896.1	100	1604273	1604199
88	CP013049.1	100	3775632	3775706
88	CU458896.1	100	747943	747869
88	CP012044.1	98.67	838806	838732
89	CP003699.2	100	3689424	3689498
89	CP014952.1	100	1042702	1042628
89	CP013049.1	100	949440	949366
89	CU458896.1	100	1080722	1080648
89	CP014953.1	100	1049927	1049853
89	CP014951.1	100	1128520	1128446
89	CP004374.1	100	1104334	1104260
90	CU458896.1	100	2661721	2661795
90	CP013049.1	100	2470278	2470352
90	CP012044.1	100	2675927	2676001
90	CP014950.1	98.67	2485688	2485762
91	CP012044.1	100	2756485	2756558
91	CU458896.1	100	2754265	2754338
91	CP013049.1	100	2562820	2562893
92	CP013049.1	100	128241	128167
92	CP012044.1	100	187577	187503
92	CU458896.1	100	142840	142766
92	CP014953.1	98.67	147985	147911
92	CP003699.2	98.67	4539948	4540022
92	CP014951.1	98.67	147813	147739
93	CU458896.1	100	2976320	2976246
93	CP004374.1	100	2911821	2911747
93	CP013049.1	100	2784037	2783963
93	CP014950.1	100	2792413	2792339
93	CP012044.1	100	3257942	3257868
93	CP014953.1	98.67	3079055	3078981
93	CP014951.1	98.67	3214023	3213949
93	CP003699.2	98.67	1954286	1954360
93	CP014952.1	98.67	2876894	2876820
93	AP014547.1	98.67	2951627	2951553
94	CU458896.1	100	474424	474498
94	CP012044.1	100	524843	524917
94	CP013049.1	100	455312	455386
94	CP014952.1	98.67	412370	412444
94	AP014547.1	98.67	466943	467017
95	CP012044.1	100	3479151	3479225
95	CU458896.1	100	3207417	3207491
95	CP013049.1	100	3014927	3015001
95	CP014950.1	98.67	3017654	3017728
96	CU458896.1	100	3677330	3677256
96	CP014953.1	100	3767486	3767412
96	CP014952.1	100	3544682	3544608
96	CP014951.1	100	3902454	3902380
96	CP003699.2	100	1269592	1269666
96	CP013049.1	100	3540711	3540637
96	CP012044.1	100	3920311	3920237
96	CP004374.1	100	3645396	3645322
96	AP014547.1	100	3628061	3627987
97	CP014950.1	100	2534006	2534080
97	CP012044.1	100	2722422	2722496
98	CP012044.1	100	2270172	2270246
98	CP013049.1	98.67	2077871	2077945
98	CU458896.1	98.67	2277592	2277666
99	AP014547.1	100	4858861	4858935
99	CP012044.1	100	5154317	5154391
99	CP013049.1	100	4888150	4888224
99	CP014952.1	100	4729744	4729818
99	CU458896.1	100	4881359	4881433
99	CP014950.1	98.67	4704010	4704084
100	CU458896.1	100	4255673	4255747
100	CP013049.1	100	4260163	4260237
101	CU458896.1	100	635889	635963
101	CP012044.1	100	726768	726842
101	CP013049.1	100	616655	616729
102	CP013049.1	100	3471257	3471331
102	CU458896.1	100	3607597	3607671
103	CU458896.1	100	3498416	3498490
103	CP013049.1	100	3305746	3305820
103	CP012044.1	100	3768485	3768559
104	CP014952.1	100	956719	956645
104	CU458896.1	100	1013406	1013332
104	CP012044.1	100	1066935	1066861
104	CP013049.1	100	882202	882128
104	AP014547.1	98.67	928757	928683
104	CP014950.1	98.67	920363	920289
104	CP003699.2	98.67	3756486	3756560
104	CP014953.1	98.67	982864	982790
104	CP004374.1	98.67	1026939	1026865
104	CP014951.1	98.67	1061457	1061383
105	CP003699.2	100	4186702	4186628
105	CP004374.1	100	534848	534922
105	CP014953.1	100	552662	552736
105	CP013049.1	100	498860	498934
105	CP012044.1	100	608862	608936
105	CP014950.1	100	477715	477789
105	CP014951.1	100	631255	631329
105	CU458896.1	100	517983	518057
105	CP014952.1	98.67	452741	452815
105	AP014547.1	98.67	507313	507387
106	CU458896.1	100	747703	747777
106	CP012044.1	100	838566	838640
106	CP013049.1	100	3775872	3775798
106	CP003699.2	98.67	3959872	3959798
106	CP014951.1	98.67	858055	858129
106	CP004374.1	98.67	761576	761650
106	AP014547.1	98.67	737087	737161
106	CP014952.1	98.67	680507	680581
106	CP014953.1	98.67	779462	779536
107	CP012044.1	100	3773347	3773421
107	CU458896.1	100	3503278	3503352
107	CP013049.1	100	3310608	3310682
108	CP013049.1	100	2214826	2214752
108	CP012044.1	100	2409022	2408948
108	CU458896.1	100	2415092	2415018
108	CP014950.1	98.67	2237433	2237359
108	CP014953.1	98.67	2259372	2259298
108	CP014952.1	98.67	2258772	2258698
108	CP014951.1	98.67	2392643	2392569
108	CP003699.2	98.67	2541812	2541886
108	CP004374.1	98.67	2349348	2349274
108	AP014547.1	98.67	2332455	2332381
109	CU458896.1	100	1614269	1614343
109	CP013049.1	100	1482556	1482630
109	CP012044.1	100	1749124	1749198
109	CP014950.1	100	1502983	1503057
110	CP013049.1	100	948674	948748
110	CU458896.1	100	1079956	1080030
110	CP012044.1	100	1220577	1220651
111	CP013049.1	100	2616277	2616351
111	CP012044.1	100	2810009	2810083
111	CU458896.1	100	2807807	2807881
112	CP012044.1	100	2699581	2699655
113	CP014952.1	100	1119824	1119750
114	CU458896.1	100	2976111	2976185
114	CP012044.1	100	3257733	3257807
114	CP013049.1	100	2783828	2783902
114	AP014547.1	100	2951418	2951492
114	CP014953.1	98.67	3078846	3078920
114	CP014950.1	98.67	2792204	2792278
114	CP003699.2	98.67	1954495	1954421
114	CP014951.1	98.67	3213814	3213888
114	CP004374.1	98.67	2911612	2911686
115	CP014953.1	100	4984260	4984186
115	CP014951.1	100	5162153	5162079
115	CP004374.1	100	4921536	4921462
115	CP003699.2	100	80279	80353
115	CP014952.1	100	4759728	4759654
115	AP014547.1	100	4888813	4888739
115	CP014950.1	98.67	4743054	4742980
115	CP013049.1	98.67	4921359	4921285
115	CU458896.1	98.67	4914710	4914636
115	CP012044.1	98.67	5187666	5187592
116	CP012044.1	100	524941	524867
116	CU458896.1	100	474522	474448
116	CP013049.1	100	455410	455336
116	AP014547.1	98.67	467041	466967
116	CP014952.1	98.67	412468	412394
117	CU458896.1	100	3207837	3207763
117	CP013049.1	100	3015347	3015273
117	CP012044.1	100	3479571	3479497
118	CP014952.1	100	3544587	3544661
118	CP003699.2	100	1269687	1269613
118	CP014953.1	100	3767391	3767465
118	CP013049.1	100	3540616	3540690
118	CP004374.1	100	3645301	3645375
118	AP014547.1	100	3627966	3628040
118	CP014951.1	100	3902359	3902433
118	CP012044.1	100	3920216	3920290
118	CU458896.1	100	3677235	3677309
119	CP004374.1	100	4994410	4994336
119	CP014951.1	100	5236308	5236234
119	CP013049.1	100	5067396	5067322
119	CP014952.1	100	4863234	4863160
119	CP003699.2	100	6124	6198
119	CU458896.1	100	5061108	5061034
119	CP014950.1	100	4819981	4819907
119	CP014953.1	100	5058415	5058341
119	AP014547.1	100	4972321	4972247
119	CP012044.1	100	5251072	5250998
120	CP013049.1	100	2957658	2957584
120	CU458896.1	100	3150148	3150074
120	CP012044.1	100	3421922	3421848
120	CP003699.2	98.67	1791215	1791289
120	CP014953.1	98.67	3245759	3245685
120	CP004374.1	98.67	3085360	3085286
120	CP014950.1	98.67	2963207	2963133
120	CP014952.1	98.67	3043595	3043521
120	CP014951.1	98.67	3380727	3380653
121	CP004374.1	100	3036242	3036316
121	CP013049.1	100	2908458	2908532
121	CP014951.1	100	3331607	3331681
121	CP014952.1	100	2994490	2994564
121	CP003699.2	100	1840334	1840260
121	CU458896.1	100	3100947	3101021
121	CP014953.1	100	3196639	3196713
121	AP014547.1	100	3068907	3068981
121	CP012044.1	100	3372750	3372824
121	CP014950.1	98.67	2915027	2915101
122	CP012044.1	100	4075003	4074929
122	CP014953.1	98.67	3936291	3936217
122	CP014951.1	98.67	4071259	4071185
122	CU458896.1	98.67	3834749	3834675
122	CP004374.1	98.67	3800825	3800751
122	CP003699.2	98.67	1112648	1112722
122	CP013049.1	98.67	3697986	3697912
122	AP014547.1	98.67	3804001	3803927
122	CP014952.1	98.67	3701513	3701439
123	CP003699.2	100	144869	144795
123	CP014951.1	100	5097563	5097637
123	CP013049.1	100	4853754	4853828
123	CP004374.1	100	4820541	4820615
123	CP014953.1	100	4919670	4919744
123	CP014952.1	100	4696248	4696322
123	CU458896.1	100	4846973	4847047
123	AP014547.1	98.67	4825409	4825483
123	CP012044.1	98.67	5119932	5120006
124	CU458896.1	100	4863433	4863507
124	CP014950.1	100	4686987	4687061
124	CP003699.2	100	128435	128361
124	CP014952.1	100	4712721	4712795
124	CP004374.1	100	4836975	4837049
124	CP012044.1	100	5136391	5136465
124	CP013049.1	100	4870214	4870288
124	CP014953.1	100	4936104	4936178
124	CP014951.1	100	5113997	5114071
124	AP014547.1	100	4841838	4841912
125	CP012044.1	100	764659	764733
125	AP014547.1	100	664357	664431
125	CP014952.1	100	607776	607850
125	CP013049.1	98.67	3849796	3849722
125	CU458896.1	98.67	673791	673865
125	CP003699.2	98.67	4031571	4031497
125	CP014953.1	98.67	707763	707837
125	CP004374.1	98.67	689888	689962
125	CP014950.1	98.67	633336	633410
125	CP014951.1	98.67	786356	786430
126	CP012044.1	100	4795102	4795176
126	CP014950.1	100	4336138	4336212
126	CP014952.1	100	4384071	4384145
127	CU458896.1	100	1964855	1964781
127	CP012044.1	100	2018797	2018723
127	CP013049.1	100	1770707	1770633
127	CP004374.1	100	1981286	1981212
127	CP003699.2	98.67	2906357	2906431
127	CP014952.1	98.67	1832684	1832610
127	CP014953.1	98.67	1894643	1894569
127	CP014951.1	98.67	1973106	1973032
127	AP014547.1	98.67	1967025	1966951
128	CP013049.1	100	4260261	4260187
128	CU458896.1	100	4255771	4255697
129	CU458896.1	100	2794108	2794034
129	CP013049.1	100	2602578	2602504
129	CP012044.1	100	2796310	2796236
130	CP014950.1	100	1837512	1837586
130	CP012044.1	100	2002379	2002453
130	CP004374.1	100	1964859	1964933
130	CP003699.2	100	2922763	2922689
130	CU458896.1	100	1948440	1948514
130	CP013049.1	100	1754684	1754758
130	CP014951.1	100	1956700	1956774
130	CP014953.1	100	1878237	1878311
131	CU458896.1	100	3498536	3498462
131	CP012044.1	100	3768605	3768531
131	CP013049.1	100	3305866	3305792
132	CU458896.1	100	3765481	3765555
132	CP013049.1	100	3628860	3628934
133	CP012044.1	100	3918570	3918496
133	CP013049.1	100	3538970	3538896
133	CU458896.1	100	3675589	3675515
134	CU458896.1	100	1613994	1614068
134	CP012044.1	100	1748849	1748923
134	CP013049.1	100	1482281	1482355
135	CP012044.1	100	4745033	4744959
135	CP003699.2	100	508485	508559
135	CP014951.1	100	4733942	4733868
135	CP014953.1	100	4556048	4555974
135	AP014547.1	100	4459515	4459441
135	CP013049.1	100	4480222	4480148
135	CU458896.1	100	4476575	4476501
135	CP014952.1	98.67	4335720	4335646
135	CP014950.1	98.67	4286741	4286667
136	CP013049.1	100	3981046	3981120
136	CP012044.1	100	4220142	4220216
136	CU458896.1	100	3974984	3975058
137	CU458896.1	100	2414618	2414691
137	CP012044.1	100	2408548	2408621
137	CP013049.1	100	2214352	2214425
138	CP012044.1	100	2699927	2699853
138	CP014952.1	100	2561905	2561831
138	CP003699.2	100	2267037	2267111
138	CP004374.1	100	2647223	2647149
138	CP014951.1	100	2667419	2667345
138	CP014953.1	100	2534148	2534074
138	AP014547.1	100	2629760	2629686
139	CP012044.1	98.67	2453076	2453150
140	CP013049.1	100	890000	890074
140	CU458896.1	100	1021204	1021278
140	CP014952.1	98.67	964517	964591
140	CP012044.1	98.67	1074733	1074807
141	CU458896.1	100	4232647	4232721
141	CP014950.1	100	4042643	4042717
141	CP013049.1	100	4237168	4237242
141	CP012044.1	100	4527963	4528037
141	CP014952.1	98.67	4126253	4126327
141	CP003699.2	98.67	717499	717425
141	CP004374.1	98.67	4165581	4165655
141	CP014951.1	98.67	4508272	4508346
141	CP014953.1	98.67	4330378	4330452
141	AP014547.1	98.67	4248047	4248121
142	CP013049.1	98.67	1266987	1266913
142	AP014547.1	98.67	1404359	1404285
142	CP014952.1	98.67	1332214	1332140
142	CP012044.1	98.67	1525438	1525364
142	CU458896.1	98.67	1398522	1398448
143	CP012044.1	100	4074769	4074843
143	CU458896.1	100	3834515	3834589
143	CP013049.1	100	3697752	3697826
144	CP012044.1	100	2473621	2473547
144	CP013049.1	100	2280191	2280117
144	CU458896.1	100	2480449	2480375
145	CP013049.1	100	4822391	4822465
145	CU458896.1	100	4815577	4815651
145	CP012044.1	100	5088542	5088616
145	AP014547.1	98.67	4795537	4795611
145	CP014953.1	98.67	4888332	4888406
145	CP004374.1	98.67	4780094	4780168
145	CP014951.1	98.67	5066225	5066299
145	CP014952.1	98.67	4666391	4666465
145	CP003699.2	98.67	176207	176133
146	CP013049.1	100	2554100	2554173
146	CP012044.1	100	2747765	2747838
146	CU458896.1	100	2745545	2745618
146	AP014547.1	100	2676295	2676368
146	CP003699.2	98.65	2220468	2220395
146	CP014953.1	98.65	2580716	2580789
146	CP014952.1	98.65	2620468	2620541
146	CP014951.1	98.65	2713987	2714060
146	CP004374.1	98.65	2693786	2693859
147	CP013049.1	100	4654740	4654666
147	CP014952.1	100	4496931	4496857
147	CU458896.1	100	4646600	4646526
147	CP012044.1	100	4919298	4919224
148	CP014953.1	100	1091214	1091287
148	CP014950.1	100	1036728	1036801
148	CP004374.1	100	1172068	1172141
148	CP003699.2	100	3649269	3649196
148	AP014547.1	100	1144007	1144080
148	CP014951.1	100	1169807	1169880
148	CU458896.1	100	1141044	1141117
148	CP013049.1	100	1009729	1009802
148	CP014952.1	100	1083998	1084071
148	CP012044.1	100	1262011	1262084
149	CP013049.1	100	3629162	3629088
149	CU458896.1	100	3765783	3765709
149	CP014951.1	98.67	4004514	4004440
149	CP003699.2	98.67	1179393	1179467
149	CP004374.1	98.67	3734721	3734647
149	CP014953.1	98.67	3869546	3869472
149	CP014950.1	98.67	3573963	3573889
149	CP012044.1	98.67	4008754	4008680
150	CP013049.1	98.67	4250793	4250867
150	CU458896.1	98.67	4246303	4246377
150	CP012044.1	98.67	4541619	4541693
151	CU458896.1	98.67	618791	618717
151	CP013049.1	98.67	599683	599609
152	CP013049.1	100	2649459	2649533
152	CU458896.1	100	2841053	2841127
152	CP012044.1	100	2843254	2843328
152	CP014950.1	98.67	2650954	2651028
153	CP013049.1	100	3501084	3501011
153	CP003699.2	100	1311339	1311412
153	CP014953.1	100	3725739	3725666
153	CP004374.1	100	3603648	3603575
153	CP014951.1	100	3860707	3860634
153	CP014952.1	100	3502938	3502865
153	AP014547.1	100	3586315	3586242
153	CU458896.1	100	3637521	3637448
153	CP012044.1	100	3880504	3880431
153	CP014950.1	98.65	3446747	3446674
154	CU458896.1	100	3607089	3607162
154	CP013049.1	100	3470749	3470822
155	CP012044.1	100	1074841	1074767
155	CP013049.1	100	890108	890034
155	CU458896.1	100	1021312	1021238
156	CP012044.1	100	377015	376941
156	CP013049.1	100	315650	315576
156	CP014950.1	100	343150	343076
156	CU458896.1	100	347584	347510
157	CP012044.1	100	4528072	4527998
157	CU458896.1	100	4232756	4232682
157	CP014950.1	100	4042752	4042678
157	CP013049.1	100	4237277	4237203
158	CP013049.1	100	1732432	1732506
158	CU458896.1	100	1926187	1926261
159	CP004374.1	100	4179416	4179342
159	CP003699.2	100	703664	703738
159	AP014547.1	100	4261882	4261808
159	CP014952.1	100	4140088	4140014
159	CP014951.1	100	4522107	4522033
159	CP014953.1	100	4344213	4344139
160	CP013049.1	100	599507	599580
160	CU458896.1	100	618615	618688
160	CP012044.1	100	709494	709567
161	CU458896.1	100	2841202	2841128
161	CP013049.1	100	2649608	2649534
161	CP012044.1	100	2843403	2843329
162	CP014952.1	98.67	1119719	1119793
163	CP014950.1	98.67	4141672	4141746
163	CP012044.1	98.67	4642941	4643015
163	CP013049.1	98.67	4333856	4333930
163	CU458896.1	98.67	4329550	4329624
164	CP012044.1	98.67	4623856	4623930
165	CP012044.1	98.67	1884028	1884102
165	CP014952.1	98.67	1687469	1687543
165	CP003699.2	98.67	3051521	3051447
165	CP014950.1	98.67	1646283	1646357
165	CU458896.1	98.67	1749207	1749281
165	CP013049.1	98.67	1617296	1617370
165	CP004374.1	98.67	1845113	1845187
165	CP014951.1	98.67	1827946	1828020
165	CP014953.1	98.67	1749481	1749555
165	AP014547.1	97.33	1759512	1759586
166	CU458896.1	98.67	2517488	2517414
166	CP012044.1	98.67	2510673	2510599
166	CP013049.1	98.67	2317230	2317156
166	CP014950.1	98.67	2329576	2329502
167	CP014951.1	100	2762212	2762285
167	CP013049.1	100	2602312	2602385
167	CP012044.1	100	2796044	2796117
167	CP014953.1	100	2628941	2629014
167	CP014952.1	100	2668694	2668767
167	CU458896.1	100	2793842	2793915
167	AP014547.1	100	2724536	2724609
167	CP003699.2	100	2172242	2172169
167	CP004374.1	100	2742013	2742086
168	CP014952.1	98.67	4365631	4365705
169	CP012044.1	98.67	2359427	2359353
169	CU458896.1	98.67	2365496	2365422
169	CP013049.1	98.67	2165601	2165527
169	CP014950.1	98.67	2188122	2188048
170	CP012044.1	100	4744758	4744830
170	CP013049.1	100	4479947	4480019
170	CU458896.1	100	4476300	4476372
171	CP012044.1	98.67	4643072	4642998
171	CU458896.1	98.67	4329681	4329607
171	CP013049.1	98.67	4333987	4333913
172	CP013049.1	98.67	2317152	2317226
172	CP012044.1	98.67	2510595	2510669
172	CU458896.1	98.67	2517410	2517484
173	CU458896.1	100	2277705	2277632
173	CP012044.1	100	2270285	2270212
173	CP013049.1	100	2077984	2077911
174	CP012044.1	100	4919161	4919235
174	CP014952.1	100	4496794	4496868
174	CU458896.1	100	4646463	4646537
174	CP013049.1	100	4654603	4654677
175	CP013049.1	98.67	1009928	1009854
175	CU458896.1	98.67	1141243	1141169
176	CU458896.1	98.67	3912935	3913009
176	CP012044.1	98.67	4153104	4153178
176	CP013049.1	98.67	3907586	3907660
176	CP014950.1	98.67	3724316	3724390
177	CP014953.1	98.67	3161195	3161269
177	CP003699.2	98.67	1875778	1875704
177	CP012044.1	98.67	3335408	3335482
177	CP014952.1	98.67	2959046	2959120
177	CP004374.1	98.67	3000798	3000872
177	CP014951.1	98.67	3296163	3296237
177	CP014950.1	98.67	2879586	2879660
177	AP014547.1	98.67	3033517	3033591
178	CP003699.2	98.67	4031186	4031260
178	CP012044.1	98.67	765044	764970
178	CU458896.1	98.67	674176	674102
178	CP014951.1	98.67	786741	786667
178	AP014547.1	98.67	664742	664668
178	CP013049.1	98.67	3849411	3849485
178	CP014952.1	98.67	608161	608087
178	CP014953.1	98.67	708148	708074
179	CP014951.1	98.67	1830583	1830509
179	AP014547.1	98.67	1762149	1762075
179	CP004374.1	98.67	1847750	1847676
179	CP003699.2	98.67	3048884	3048958
179	CP014953.1	98.67	1752118	1752044
180	CP013049.1	98.67	2626111	2626037
180	CU458896.1	98.67	2817705	2817631
181	CP012044.1	98.67	1525288	1525362
182	CP012044.1	98.67	1432258	1432332

## Sheet: Human alphaherpesvirus 1
Reads number	Reference	Identity	Start	End
1	JN555585.1	100	127987	128061
1	LT576870.1	100	143254	143180
1	LT576867.1	100	140394	140320
1	X14112.1	100	127984	128058
1	LT576869.1	100	140329	140255
1	LT608134.1	100	142338	142264
1	LT576869.1	100	120648	120722
1	LT594108.1	100	149561	149487
1	JN555585.1	100	150210	150136
1	LT594108.1	100	127330	127404
1	LT594192.1	100	127001	127075
1	LT576867.1	100	120323	120397
1	LT576870.1	100	122992	123066
1	X14112.1	100	150249	150175
1	LT576870.1	100	122355	122429
1	LT594192.1	100	149148	149074
2	X14112.1	100	52463	52389
2	LT576869.1	100	51363	51289
2	LT594192.1	100	52228	52154
2	LT594108.1	100	52258	52184
2	LT576870.1	100	48234	48160
2	LT576867.1	100	52122	52048
2	LT608134.1	100	47618	47544
2	LT576871.1	100	50814	50740
2	LT576868.1	100	46657	46583
2	JN555585.1	100	52464	52390
3	LT594108.1	100	149428	149502
3	LT576867.1	100	140261	140335
3	LT594192.1	100	149015	149089
3	LT576870.1	100	143121	143195
3	LT576869.1	100	140196	140270
3	LT576870.1	100	122488	122414
3	X14112.1	100	128117	128043
3	X14112.1	100	150116	150190
3	LT594192.1	100	127134	127060
3	LT594108.1	100	127463	127389
3	LT608134.1	100	142205	142279
3	JN555585.1	100	128120	128046
3	LT576870.1	100	123125	123051
3	LT576867.1	100	120456	120382
3	LT576869.1	100	120781	120707
3	JN555585.1	100	150077	150151
4	LT576871.1	100	35527	35453
4	LT594108.1	100	36976	36902
4	LT576869.1	100	35858	35784
4	LT594192.1	100	36948	36874
4	LT576867.1	100	36838	36764
4	LT576870.1	100	32945	32871
4	LT576868.1	100	31371	31297
4	LT608134.1	100	32331	32257
4	JN555585.1	98.67	37172	37098
4	X14112.1	98.67	37171	37097
5	LT594192.1	98.67	36792	36866
5	LT576871.1	98.67	35371	35445
5	LT576867.1	98.67	36682	36756
5	LT608134.1	98.67	32175	32249
5	LT594108.1	98.67	36820	36894
5	JN555585.1	98.67	37016	37090
5	LT576869.1	98.67	35702	35776
5	X14112.1	98.67	37015	37089
5	LT576870.1	98.67	32789	32863
5	LT576868.1	98.67	31215	31289
6	LT594108.1	98.67	104433	104359
6	LT594192.1	98.67	104260	104186
6	LT576868.1	98.67	98785	98711
6	LT576871.1	98.67	104277	104203
6	LT608134.1	98.67	101725	101651
7	LT594108.1	98.67	104301	104375
7	X14112.1	98.67	104571	104645
7	LT576871.1	98.67	104145	104219
7	LT594192.1	98.67	104128	104202
7	LT576867.1	98.67	104383	104457
7	LT608134.1	98.67	101593	101667
7	LT576868.1	98.67	98653	98727
7	LT576870.1	98.67	100275	100349
7	LT576869.1	98.67	103281	103355
7	JN555585.1	98.67	104572	104646
8	LT576871.1	100	50690	50761
